# Supplementary material for: Improving public understanding of ‘overdiagnosis’ in England: a population survey assessing familiarity with possible terms for labelling the concept and perceptions of appropriate terminology
Source: PubMed Central journal article supplement (PMC6020944; doi:10.1136/bmjopen-2017-021260), 2018-06-27
Supplement: bmjopen-2017-021260.draft_revisions.pdf [file bmjopen-2017-021260.draft_revisions.pdf]

# BMJ Open

BMJ Open is committed to open peer review. As part of this commitment we make the peer review history of every article we publish publicly available.

When an article is published we post the peer reviewers' comments and the authors' responses online. We also post the versions of the paper that were used during peer review. These are the versions that the peer review comments apply to.

The versions of the paper that follow are the versions that were submitted during the peer review process. They are not the versions of record or the final published versions. They should not be cited or distributed as the published version of this manuscript.

BMJ Open is an open access journal and the full, final, typeset and author-corrected version of record of the manuscript is available on our site with no access controls, subscription charges or pay-per-view fees (<http://bmjopen.bmj.com>).

If you have any questions on BMJ Open's open peer review process please email [info.bmjopen@bmj.com](mailto:info.bmjopen@bmj.com)

# BMJ Open

## Improving public understanding of 'overdiagnosis': a population survey assessing familiarity with possible terms for labelling the concept and perceptions of appropriate terminology

|                               |                                                                                                                                                                                                                                                           |
|-------------------------------|-----------------------------------------------------------------------------------------------------------------------------------------------------------------------------------------------------------------------------------------------------------|
| Journal:                      | <i>BMJ Open</i>                                                                                                                                                                                                                                           |
| Manuscript ID                 | bmjopen-2017-021260                                                                                                                                                                                                                                       |
| Article Type:                 | Research                                                                                                                                                                                                                                                  |
| Date Submitted by the Author: | 19-Dec-2017                                                                                                                                                                                                                                               |
| Complete List of Authors:     | Ghanouni, Alex; University College London, Research Department of Behavioural Science and Health<br>Renzi, Cristina; UCL, Research Department of Behavioural Science and Health<br>Waller, Jo; UCL, Research Department of Behavioural Science and Health |
| Keywords:                     | EPIDEMIOLOGY, PUBLIC HEALTH, Health policy < HEALTH SERVICES ADMINISTRATION & MANAGEMENT                                                                                                                                                                  |
|                               |                                                                                                                                                                                                                                                           |

SCHOLARONE™  
Manuscripts

Peer Review Only

**FULL TITLE PAGE**

**Title:** Improving public understanding of 'overdiagnosis': a population survey assessing familiarity with possible terms for labelling the concept and perceptions of appropriate terminology

**Manuscript type:** Research article

Authors:

Alex Ghanouni<sup>a</sup> a.ghanouni@ucl.ac.uk

Cristina Renzi<sup>a</sup> c.renzi@ucl.ac.uk

Jo Waller<sup>ab</sup> j.waller@ucl.ac.uk | Tel: +44 (0)20 7679 5958 | Fax: +44 (0)20 7679 8354

Affiliations:

<sup>a</sup>Research Department of Behavioural Science and Health, University College London, Gower Street, London, WC1E 6BT, United Kingdom

<sup>b</sup>Corresponding author

**Word count:** Abstract: 245/300; Body: 2,178/4,000; References: 20; Tables or figures: 3

**ABSTRACT**

*Objectives:* Communicating the concept of 'overdiagnosis' to lay individuals is challenging, partly because the term itself is confusing. This study tested whether alternative descriptive labels may be more appropriate.

*Design:* Questionnaire preceded by a description of overdiagnosis.

*Setting:* Home-based, computer-assisted face-to-face survey.

*Participants:* 2,111 adults aged 18 to 70 years in England recruited using random location sampling by a survey company. Data from 1,888 participants were analysed after exclusions due to missing data.

*Interventions:* Participants were given one of two pieces of text describing overdiagnosis, allocated at random, adapted from NHS breast and prostate cancer screening leaflets.

*Primary and secondary outcome measures:* Main outcomes were which of several available terms (e.g. 'overdetection') participants stated they had previously encountered and which they endorsed as applicable labels for the concept as described. Demographics and previous exposure to screening information were also measured.

*Results:* 58.0% of participants had not encountered any of the available terms; 44.0% did not endorse any as applicable labels. No term was notably familiar; the proportion of participants stating they had previously encountered each term ranged from 15.9 to 28.3%. Each term was only endorsed as applicable by a minority of participants (range: 27.6% to 40.4%). Findings were similar for both pieces of information.

1  
2  
3  
4  
5  
6  
7  
8 *Conclusions:* Familiarity with suggested terms for overdiagnosis and levels of endorsement  
9  
10 were low and no clear alternative labels for the concept were identified, suggesting that  
11  
12 changing terminology alone would do little to improve understanding. Explicit descriptions may  
13  
14 be more effective.

15  
16 Keywords: Decision Making; Surveys and Questionnaires; Early Detection of Cancer; Mass  
17  
18 Screening; Medical Overuse  
19

#### 20 **Strengths and limitations of this study**

- 21 • This study assessed familiarity and perceived appropriateness of a broad range of  
22 possible terms for the concept of 'overdiagnosis' among a large, representative  
23 sample of the general public in England.
- 24 • The concept was described based on information that was widely used by the  
25 National Health Service in England, maintaining generalisability.
- 26 • The list of possible terms was not exhaustive; more suitable alternative labels may  
27 have been omitted.
- 28 • Results may be time-dependent: ongoing communication initiatives may change  
29 perceptions of appropriate terms for the concept of 'overdiagnosis'.  
30  
31  
32  
33  
34  
35  
36  
37  
38  
39

#### 40 **INTRODUCTION**

41  
42 There is growing concern about the potential for medical tests to detect asymptomatic disease  
43  
44 that would never have become clinically apparent or resulted in death (1). 'Overdiagnosis' can  
45  
46 harm, primarily via the subsequent risks and costs associated with unnecessary treatment but  
47  
48 also via opportunity costs to a healthcare service due to overuse of scarce resources (2).  
49  
50  
51  
52  
53  
54  
55  
56  
57  
58  
59  
60

1  
2  
3  
4  
5  
6  
7  
8 Various initiatives have aimed to propagate understanding of the concept among patients and  
9 the public so that they can make better informed decisions about their health (e.g. 3–5).  
10  
11 However, previous studies have found that the concept is challenging to communicate to lay  
12  
13 people (e.g. in the context of breast cancer screening; 6,7).  
14  
15

16 Little is known about how to improve communication of overdiagnosis (8). One barrier is that the  
17  
18 term ‘overdiagnosis’ itself may be confusing (e.g. since it resembles ‘misdiagnosis’; 9). Hence,  
19  
20 this study asked a large sample of the public in England to appraise descriptions of the concept  
21  
22 and tested which of several possible terms people thought made sense as labels (i.e.  
23  
24 endorsement). Alternatives included ‘overdetection’ or ‘unnecessary diagnosis’ (10) as well as  
25  
26 terms related to unnecessary therapy (e.g. ‘overtreatment’) and terms that were less technically  
27  
28 accurate but still had the potential to be seen as applicable (e.g. ‘false positives’; 9, 11). A  
29  
30 limitation to the utility of ‘overdiagnosis’ as a label may be the currently low level of public  
31  
32 awareness of the term (9, 12). Consequently, this study also measured which terms people had  
33  
34 encountered before (i.e. familiarity) to test whether any alternatives were notably more familiar.

35 Information was derived from materials that have been widely used by the NHS Breast  
36  
37 Screening Programme (13) and the Prostate Cancer Risk Management Programme (14). The  
38  
39 study was carried out as part of Wave 3 of the Attitudes, Behaviour and Cancer UK Survey  
40  
41 (ABACUS). Other studies arising from this survey have also been published (e.g. 15).  
42

## 43 **METHODS**

### 44 **Design**

45  
46 Institutional approval was granted by the University College London Research Ethics  
47  
48 Committee (5771/002). The focus of the present study was on appropriate terminology for  
49  
50  
51  
52  
53  
54  
55  
56  
57  
58  
59  
60

1  
2  
3  
4  
5  
6  
7  
8 widely used descriptions of overdiagnosis. However, the ABACUS survey was a broader piece  
9  
10 of work that also compared the perceived clarity of different forms of overdiagnosis information.  
11 Hence, elements of the design and measures have also been reported elsewhere (15). Face-to-  
12 face computer-assisted interviews were conducted by TNS (a market research company) as  
13 part of a weekly omnibus survey and took place in participants' homes between April and May  
14 2016. Participants were informed:

15  
16  
17  
18  
19  
20 *"We would now like to ask you some questions about leaflets on health-related topics. The NHS*  
21 *offers people a variety of screening tests to check for illnesses before symptoms have*  
22 *appeared. People offered an NHS screening test are often given a leaflet that explains the risks*  
23 *and benefits of having the test. The leaflet is either posted or given out by a doctor or nurse."*  
24

25  
26  
27  
28 Participants then received information on overdiagnosis adapted from written material used by  
29 the NHS in England as part of either i) the Breast Screening Programme or ii) the Prostate  
30 Cancer Risk Management Programme as they existed in February 2016 (neither of which used  
31 a specific label), allocated at random in a 1:1 ratio:

32  
33  
34  
35  
36 *"The test can find an illness that would never have caused a person harm. Some people will be*  
37 *diagnosed and treated for an illness that would never otherwise have been found and would not*  
38 *have become life-threatening."* From the breast screening information leaflet (13)  
39

40  
41  
42 *"The test may make you worry by finding an illness that may never cause any symptoms or*  
43 *shorten your life."* From the prostate screening information leaflet (14)  
44

45  
46  
47  
48  
49  
50  
51  
52  
53  
54  
55  
56  
57  
58  
59  
60  
References to cancer were removed so that findings could be generalised to beyond these two  
specific screening contexts.

## Participants

1  
2  
3  
4  
5  
6  
7  
8 Participants were members of the public in England aged 18 to 70 years. National  
9  
10 representativeness was sought via a two-stage process. In the first instance, random location  
11  
12 sampling was carried out using the Postcode Address File and Census statistics. Within each  
13  
14 selected location, participant quotas were set based on demographic characteristics (e.g. age,  
15  
16 gender, employment status).

### 17 18 **Measures**

19  
20 Demographics: Relevant measures consisted of age, gender, ethnicity, social grade (16),  
21  
22 marital status, highest level of education obtained, personal history of cancer, and whether  
23  
24 anyone they know had been diagnosed with cancer.

25  
26 Familiarity with screening information: Participants were asked whether they had ever  
27  
28 previously received information about screening (for cancer or other illnesses) via i) reading a  
29  
30 leaflet from the NHS, ii) reading an NHS website, and iii) talking with a doctor or nurse  
31  
32 (response options: "yes", "no", "not sure").

33  
34 If participants were eligible for cancer screening and had not been diagnosed with the target  
35  
36 disease, they were asked about their previous participation via items designed using the  
37  
38 Precaution Adoption Process Model (PAPM; 17), a stage theory of protective health behaviour.  
39  
40 This measures whether participants have heard of a particular type of screening, whether they  
41  
42 have heard of a type of screening but have never been invited, whether they have been invited  
43  
44 but never participated, whether they have participated but not consistently, and whether they  
45  
46 have participated consistently. Eligibility criteria and exact question wording for assessing  
47  
48 experience have been reported elsewhere (15).

1  
2  
3  
4  
5  
6  
7  
8 Perceived clarity of information: After reading the information allocated at random, participants  
9  
10 were asked, "How clear do you find this description of a risk of the test?" with available  
11 responses of "extremely clear", "very clear", "moderately clear", "slightly clear", and "not at all  
12 clear". This was followed by a question on whether they had read or heard similar information  
13 about a screening test before (possible responses were: "yes", "no", and "not sure").  
14  
15

16  
17  
18 Main outcomes: The first main outcome measure (endorsement) consisted of "Does this term  
19 make sense to you as a way of describing this risk of a screening test?", followed by seven  
20 terms: "overdiagnosis", "overdetection", "unnecessary diagnosis", "overtreatment", "unnecessary  
21 treatment", "false positive diagnosis", and "false positive test results"<sup>1</sup> (responses: "yes", "no").  
22  
23 Suggested terms were based on previous literature (e.g. 10) and group discussion among the  
24 research team.  
25  
26  
27  
28

29 The second outcome measure (familiarity) was: "Have you ever seen or heard any of the  
30 previous seven terms before today?" and if participants responded "yes", they were asked  
31 which out of the previous terms (responses: "yes", "no", "not sure").  
32  
33  
34

### 35 Analysis

36  
37  
38 Participants were excluded if they declined to answer any of the measures included in this  
39 study. Methods of coding ethnicity, marital status, highest level of education obtained, social  
40  
41  
42  
43

---

44  
45  
46 <sup>1</sup> Participants were also asked, "Can you think of any other terms to describe this risk that would  
47 make sense to you?". However, only approximately 60 responses suggesting potentially  
48 applicable terms were recorded across all participants (e.g. "oversensitivity", "unknown  
49 diagnosis"), of which most were mentioned just once and so no further analysis was attempted.  
50  
51  
52  
53  
54  
55  
56  
57  
58  
59  
60

1  
2  
3  
4  
5  
6  
7  
8 grade, and previous cancer screening participation (i.e. whether they had ever taking part in  
9 each form of screening for which they were eligible) have been reported elsewhere (15).

10  
11  
12 Sample characteristics were summarised with descriptive statistics. We report the percentages  
13 of participants (with binomial 95% confidence intervals) who had previously encountered and  
14 endorsed each possible number of terms (from 0 to 7 in both cases), and the percentages of  
15 participants who had previously encountered and endorsed each specific term.  
16  
17  
18

## 19 20 21 **RESULTS**

### 22 23 **Participant characteristics**

24  
25  
26 After excluding 223 participants with missing data, 1,888 cases were analysed. Sample  
27 characteristics are presented in Table 1. Mean age was 43.6 years (standard deviation: 15.7).  
28  
29

### 30 31 **Familiarity with terms**

32  
33 Table 2 illustrates that the majority of participants (58.0%) were not familiar with any of the listed  
34 terms. However, the second most common number of terms recognised as familiar was all  
35 seven (12.3%). The percentages of participants previously encountering between one and six  
36 terms ranged from 1.1% to 9.4%. Table 2 also shows that the percentages of participants who  
37 had encountered each specific term ranged from 15.9% (*“overdetection”*) to 28.3% (*“false  
38 positive test results”*).  
39  
40  
41  
42  
43  
44  
45  
46  
47  
48  
49  
50  
51  
52  
53  
54  
55  
56  
57  
58  
59  
60

Table 1 – Characteristics of the sample

| <b>Total N=1,888</b>                              |          |            |
|---------------------------------------------------|----------|------------|
| <b>Characteristic</b>                             | <b>n</b> | <b>(%)</b> |
| <b>Overdiagnosis information</b>                  |          |            |
| Breast screening text                             | 987      | (52.3)     |
| Prostate screening text                           | 901      | (47.7)     |
| <b>Gender</b>                                     |          |            |
| Male                                              | 879      | (46.6)     |
| Female                                            | 1,009    | (53.4)     |
| <b>Ethnicity</b>                                  |          |            |
| White British                                     | 1,432    | (75.8)     |
| Other ethnic groups                               | 456      | (24.2)     |
| <b>Marital status</b>                             |          |            |
| Married or living as a couple                     | 1,133    | (60.0)     |
| Single, widowed, divorced, or separated           | 755      | (40.0)     |
| <b>Highest level of education<sup>1</sup></b>     |          |            |
| No formal qualifications                          | 281      | (14.9)     |
| Approximately Level 1, 2, or 3                    | 890      | (47.1)     |
| Approximately Level 4                             | 507      | (26.9)     |
| Other                                             | 199      | (10.5)     |
| Don't know/Not sure                               | 11       | (0.6)      |
| <b>Social class grade<sup>2</sup></b>             |          |            |
| Grade A or B                                      | 386      | (20.4)     |
| Grade C1 or C2                                    | 931      | (49.3)     |
| Grade D or E                                      | 571      | (30.2)     |
| <b>Personal diagnosis of cancer</b>               |          |            |
| Yes                                               | 98       | (5.2)      |
| No                                                | 1,790    | (94.8)     |
| <b>Knows someone with cancer</b>                  |          |            |
| Yes                                               | 1,113    | (59.0)     |
| No                                                | 771      | (40.8)     |
| Don't know/Not sure                               | 4        | (0.2)      |
| <b>Any previous cervical screening experience</b> |          |            |
| Yes                                               | 652      | (34.5)     |
| No                                                | 226      | (12.0)     |
| Not eligible                                      | 1,010    | (53.5)     |
| <b>Any previous breast screening experience</b>   |          |            |
| Yes                                               | 317      | (16.8)     |
| No                                                | 83       | (4.4)      |
| Not eligible                                      | 1,488    | (78.8)     |
| <b>Any previous bowel screening experience</b>    |          |            |
| Yes                                               | 293      | (15.5)     |
| No                                                | 181      | (9.6)      |
| Not eligible                                      | 1,414    | (74.9)     |
| <b>Any previous prostate screening experience</b> |          |            |
| Yes                                               | 77       | (4.1)      |
| No                                                | 344      | (18.2)     |
| Not eligible                                      | 1,467    | (77.7)     |
| <b>Previously read a screening leaflet</b>        |          |            |
| Yes                                               | 1,058    | (56.0)     |
| No                                                | 809      | (42.8)     |
| Don't know/Not sure                               | 21       | (1.1)      |
| <b>Previously read an NHS screening website</b>   |          |            |
| Yes                                               | 324      | (17.2)     |
| No                                                | 1,549    | (82.0)     |
| Don't know/Not sure                               | 15       | (0.8)      |
| <b>Discussed screening with doctor/nurse</b>      |          |            |
| Yes                                               | 624      | (33.1)     |
| No                                                | 1,251    | (66.3)     |
| Don't know/Not sure                               | 13       | (0.7)      |

---

**Previously read or heard similar information**

|                     |       |        |
|---------------------|-------|--------|
| Yes                 | 662   | (35.1) |
| No                  | 1,185 | (62.8) |
| Don't know/Not sure | 41    | (2.2)  |

---

**Perceived clarity of information**

|                  |     |        |
|------------------|-----|--------|
| Extremely clear  | 170 | (9.0)  |
| Very clear       | 636 | (33.7) |
| Moderately clear | 685 | (36.3) |
| Slightly clear   | 206 | (10.9) |
| Not at all clear | 191 | (10.1) |

<sup>1</sup>Level 1-3 qualifications include e.g. GCSEs and A Levels; Level 4 qualifications include degrees and higher degrees

<sup>2</sup>Social grades are based on occupation (e.g. Grade A includes managerial roles; Grade E includes casual workers)

---

For peer review only

Table 2 – Number of participants (and percentages and 95% CIs) previously encountering i) each number of possible terms and ii) each specific term. Participants receiving overdiagnosis information based on the Breast Screening programme or the Prostate Cancer Risk Management Programme were analysed separately.

|                       |        | Number of terms previously encountered: n, %, 95% CIs                                 |               |               |                       |               |                       |                          |                            |
|-----------------------|--------|---------------------------------------------------------------------------------------|---------------|---------------|-----------------------|---------------|-----------------------|--------------------------|----------------------------|
| Screening information | Total  | 0                                                                                     | 1             | 2             | 3                     | 4             | 5                     | 6                        | 7                          |
| Breast                | n (%)  | 583 (59.1)                                                                            | 73 (7.4)      | 76 (7.7)      | 53 (5.4)              | 41 (4.2)      | 28 (2.8)              | 9 (0.9)                  | 124 (12.6)                 |
| N=987                 | 95% CI | 56.0 to 62.1                                                                          | 5.9 to 9.2    | 6.2 to 9.5    | 4.1 to 6.9            | 3.0 to 5.5    | 1.9 to 4.0            | 0.5 to 1.7               | 10.6 to 14.7               |
| Prostate              | n (%)  | 512 (56.8)                                                                            | 64 (7.1)      | 101 (11.2)    | 47 (5.2)              | 37 (4.1)      | 19 (2.1)              | 12 (1.3)                 | 109 (12.1)                 |
| n=901                 | 95% CI | 53.6 to 60.0                                                                          | 5.6 to 8.9    | 9.3 to 13.4   | 3.9 to 6.8            | 3.0 to 5.6    | 1.3 to 3.2            | 0.7 to 2.2               | 10.1 to 14.3               |
| Total                 | n (%)  | 1,095 (58.0)                                                                          | 137 (7.3)     | 177 (9.4)     | 100 (5.3)             | 78 (4.1)      | 47 (2.5)              | 21 (1.1)                 | 233 (12.3)                 |
| N=1,888               | 95% CI | 55.8 to 60.2                                                                          | 6.2 to 8.5    | 8.1 to 10.8   | 4.4 to 6.4            | 3.3 to 4.1    | 1.9 to 3.3            | 0.7 to 1.7               | 10.9 to 13.9               |
|                       |        | <i>"Which of the following term or terms had you heard of before?": n, %, 95% CIs</i> |               |               |                       |               |                       |                          |                            |
| Screening information | Total  | Not sure                                                                              | Overdiagnosis | Overdetection | Unnecessary diagnosis | Overtreatment | Unnecessary treatment | False positive diagnosis | False positive test result |
| Breast                | n (%)  | 7 (0.7)                                                                               | 215 (21.8)    | 163 (16.5)    | 214 (21.7)            | 225 (22.8)    | 280 (28.4)            | 243 (24.6)               | 270 (27.4)                 |
| N=987                 | 95% CI | 0.3 to 1.4                                                                            | 19.3 to 24.4  | 14.3 to 18.9  | 19.2 to 24.3          | 20.3 to 25.5  | 25.6 to 31.2          | 22.0 to 27.4             | 24.6 to 30.2               |
| Prostate              | n (%)  | 14 (1.6)                                                                              | 196 (21.8)    | 137 (15.2)    | 216 (24.0)            | 186 (20.6)    | 253 (28.1)            | 232 (25.7)               | 265 (29.4)                 |
| n=901                 | 95% CI | 0.9 to 2.5                                                                            | 19.2 to 24.5  | 13.0 to 17.7  | 21.3 to 26.8          | 18.1 to 23.4  | 25.2 to 31.1          | 23.0 to 28.7             | 26.5 to 32.4               |
| Total                 | n (%)  | 21 (1.1)                                                                              | 411 (21.8)    | 300 (15.9)    | 430 (22.8)            | 411 (21.8)    | 533 (28.2)            | 475 (25.2)               | 535 (28.3)                 |
| N=1,888               | 95% CI | 0.7 to 1.7                                                                            | 20.0 to 23.7  | 14.3 to 17.6  | 20.9 to 24.7          | 20.0 to 23.7  | 26.2 to 30.3          | 23.2 to 27.2             | 26.3 to 30.4               |

Table 3 – Number of participants (and percentages and 95% CIs) endorsing i) each number of possible terms and ii) each specific term as making sense to them

|                       |        | Number of terms endorsed as making sense as a way of describing the text: n, %, 95% CIs              |               |                       |               |                       |                          |                             |              |
|-----------------------|--------|------------------------------------------------------------------------------------------------------|---------------|-----------------------|---------------|-----------------------|--------------------------|-----------------------------|--------------|
| Screening information | Total  | 0                                                                                                    | 1             | 2                     | 3             | 4                     | 5                        | 6                           | 7            |
| Breast                | n (%)  | 429 (43.5)                                                                                           | 76 (7.7)      | 86 (8.7)              | 74 (7.5)      | 67 (6.8)              | 58 (5.9)                 | 42 (4.3)                    | 155 (15.7)   |
| n=987                 | 95% CI | 40.4 to 46.6                                                                                         | 6.2 to 9.5    | 7.1 to 10.6           | 6.0 to 9.3    | 5.3 to 8.5            | 4.5 to 7.5               | 3.1 to 5.7                  | 13.5 to 18.1 |
| Prostate              | n (%)  | 408 (45.3)                                                                                           | 59 (6.5)      | 73 (8.1)              | 68 (7.5)      | 66 (7.3)              | 48 (5.3)                 | 37 (4.1)                    | 142 (15.8)   |
| n=901                 | 95% CI | 42.1 to 48.5                                                                                         | 5.1 to 8.3    | 6.5 to 10.0           | 6.0 to 9.4    | 5.8 to 9.2            | 4.0 to 6.9               | 3.0 to 5.6                  | 13.5 to 18.2 |
| Total                 | n (%)  | 837 (44.3)                                                                                           | 135 (7.2)     | 159 (8.4)             | 142 (7.5)     | 133 (7.0)             | 106 (5.6)                | 79 (4.2)                    | 297 (15.7)   |
| N=1,888               | 95% CI | 42.1 to 46.6                                                                                         | 6.1 to 8.4    | 7.2 to 9.7            | 6.4 to 8.8    | 6.0 to 8.3            | 4.6 to 6.7               | 3.4 to 5.2                  | 14.1 to 17.4 |
|                       |        | <i>"Which terms make sense as a way of describing this risk of a screening test?": n, %, 95% CIs</i> |               |                       |               |                       |                          |                             |              |
| Screening information | Total  | Overdiagnosis                                                                                        | Overdetection | Unnecessary diagnosis | Overtreatment | Unnecessary treatment | False positive diagnosis | False positive test results |              |
| Breast                | n (%)  | 334 (33.8)                                                                                           | 275 (27.9)    | 349 (35.4)            | 336 (34.0)    | 409 (41.4)            | 324 (32.8)               | 338 (34.2)                  |              |
| n=987                 | 95% CI | 30.9 to 36.8                                                                                         | 25.1 to 30.7  | 32.4 to 38.4          | 31.1 to 37.0  | 38.4 to 44.5          | 30.0 to 35.8             | 31.3 to 37.2                |              |
| Prostate              | n (%)  | 291 (32.3)                                                                                           | 247 (27.4)    | 307 (34.1)            | 280 (31.1)    | 354 (39.3)            | 320 (35.5)               | 330 (36.6)                  |              |
| n=901                 | 95% CI | 29.3 to 35.4                                                                                         | 24.6 to 30.4  | 31.0 to 37.2          | 28.1 to 34.2  | 36.1 to 42.5          | 32.4 to 38.7             | 33.5 to 39.8                |              |
| Total                 | n (%)  | 625 (33.1)                                                                                           | 522 (27.6)    | 656 (34.7)            | 616 (32.6)    | 763 (40.4)            | 644 (34.1)               | 668 (35.4)                  |              |
| N=1,888               | 95% CI | 31.0 to 35.3                                                                                         | 25.7 to 29.7  | 32.6 to 36.9          | 30.5 to 34.8  | 38.2 to 42.6          | 32.0 to 36.3             | 33.2 to 37.6                |              |

### Terms endorsed as making sense

Table 3 shows that participants most commonly did not endorse any terms as making sense (44.3%). As with results for familiarity, the second most common number of terms endorsed was all seven (15.7%). The most commonly endorsed term was “*unnecessary treatment*” (40.4% of participants in the sample endorsed this term overall; 41.4% and 39.3% after being given the breast and prostate information, respectively). Endorsement of other terms ranged from 27.9% (“*overdetection*”) to 35.4% (“*unnecessary diagnosis*”) for information from breast screening and 27.4% (“*overdetection*”) to 36.6% (“*false positive test results*”) for information from prostate screening.

### DISCUSSION

This study aimed to address a gap in the literature regarding how best to communicate the concept of overdiagnosis (8). We investigated whether people are familiar with terms used to describe overdiagnosis or related concepts, and whether these made sense as labels for widely used descriptions. We found that a majority of participants (58.0%) had never encountered any of the assessed terms before and a large proportion (44.3%) did not rate any term as making sense as a suitable label for either of two widely used descriptions of the concept. In addition, no specific term(s) emerged as being notably more familiar or applicable.

A previous similar study found that only 30.0% of the UK general public (aged 50-70) had previously encountered the specific term, ‘overdiagnosis’ (9), which is broadly comparable to the 21.8% who reported having encountered it in this study. Our findings are also consistent with those of a previous study that was part of redesign of the information materials for the NHS Breast Screening Programme (18). Women were interviewed with the aim of finding ways to

1  
2  
3  
4  
5  
6  
7  
8 communicate the concept of overdiagnosis: participants struggled to understand it, regardless  
9 of whether it was labelled as 'overdiagnosis' or 'overtreatment'.

10  
11  
12 Terminology can have a role in transferring information to lay individuals as part of a description  
13 of technical concepts (10,19). However, the main implication of our results is that currently there  
14 may only be limited value in using any of the labels that we tested. Terms used were neither  
15 familiar nor rated as particularly relevant in this large, diverse sample, meaning that they may  
16 be confusing, unintuitive, and hard for people to memorise and recall. Even the most technically  
17 appropriate terms (e.g. 'overdiagnosis' and 'overdetection') were not endorsed as making sense  
18 more frequently than suggested alternative terminology (e.g. 'unnecessary diagnosis) or more  
19 inaccurate and potentially problematic terminology (e.g. 'false positive diagnosis'). To some  
20 extent, the limited familiarity and low levels of endorsement at present supports UK policy  
21 decisions not to use a specific term in the revised breast screening information leaflet (18).  
22 Furthermore, shortly before the start of recruitment, an updated NHS information leaflet  
23 regarding PSA screening was published, with additional detail on overdiagnosis and  
24 overtreatment (20); this also omitted any specific descriptive label.

25  
26  
27 One unexpected finding was that the second most common number of terms that were familiar  
28 or endorsed was all seven (12.3% and 15.7%, respectively). This may be a reflection of  
29 differences between terms being subtle: members of the public may not recall exactly which  
30 terms they had encountered but felt that broader concepts like diagnosis and treatment were  
31 familiar.

32  
33  
34 Continuing communication efforts mean that these results may change over time: it is plausible  
35 that ongoing campaigns (3-5) will result in the public becoming increasingly familiar with the  
36 concept and terminology, having a better understanding of the differences between similar  
37  
38  
39  
40  
41  
42  
43  
44  
45  
46  
47  
48  
49  
50  
51  
52  
53  
54  
55  
56  
57  
58  
59  
60

1  
2  
3  
4  
5  
6  
7  
8 terms (e.g. seeing 'false positives' as distinct from 'overdiagnosis'), and being more likely to  
9  
10 endorse particular terms as applicable. However, present attempts to communicate  
11  
12 overdiagnosis (e.g. as part of screening invitations or mainstream media stories) may be more  
13  
14 effective if explicit descriptions are used, such as adapted forms of information from the Breast  
15  
16 Screening Programme. This has undergone an extensive design process (18) and is more likely  
17  
18 to be rated as clearer than the equivalent from the Prostate Cancer Risk Management  
19  
20 Programme. However, fewer than half of participants (46.6%) rated it as very or extremely clear,  
21  
22 suggesting that future research could be used to improve it further (e.g. by providing additional  
23  
24 detail; 15).

25  
26 This study has limitations. The list of terms tested was not exhaustive; there may be suitable  
27  
28 terminology that we did not assess. However, we found very similar levels of endorsement for  
29  
30 terms that used several variations on the themes of diagnosis, treatment, and false positives,  
31  
32 providing some evidence that any superior terms would have to be quite different. In addition,  
33  
34 as noted in our previous study, descriptions of overdiagnosis were brief and presented outside  
35  
36 the context of the original written information about screening from which they were adapted;  
37  
38 comprehension may be different (either better or worse) in the presence of additional detail (15);  
39  
40 this warrants further research.

## 41 **Conclusions**

42  
43 It has been suggested that alternative terminology to 'overdiagnosis' would help increase  
44  
45 awareness and understanding of the concept among individuals who may face healthcare  
46  
47 decisions that would put them at risk. These results suggest that, at present, using specific  
48  
49 terms would have limited benefits. It may currently be more effective to refer to the concept via  
50  
51 more explicit descriptions. Previous research indicates that information from the NHS Breast  
52  
53  
54  
55  
56  
57  
58  
59  
60

1  
2  
3  
4  
5  
6  
7  
8 Screening Programme may be a relatively effective template for this purpose. However, future  
9  
10 research could explore scope for improvement.

11  
12 **Contributors:** AG, CR, and JW conceived and designed the study. AG analysed the data. AG,  
13  
14 CR, and JW participated in the interpretation of results. AG, CR, and JW drafted the manuscript,  
15  
16 participated in critical revision, and approved the final version.

17  
18 **Funding:** This work was supported by a programme grant from Cancer Research UK awarded  
19  
20 to Prof Jane Wardle [C1418/A14134]. Dr Jo Waller is supported by a Career Development  
21  
22 Fellowship from Cancer Research UK [C7492/A17219]. Cancer Research UK was not involved  
23  
24 in the design of this study; the collection, analysis, or interpretation of the results; in the writing  
25  
26 of the manuscript; or in the decision to submit for publication.

27  
28 **Competing interests:** None declared.

29  
30  
31 **Patient consent:** Obtained.

32  
33  
34 **Data sharing:** No additional data are available.

## 35 36 REFERENCES

- 37  
38  
39 1. Heath I. Overdiagnosis: when good intentions meet vested interests — an essay by Iona  
40  
41 Heath. *Br Med J*. 2013;347:f6361.
- 42  
43 2. Moynihan R, Doust J, Henry D. Preventing overdiagnosis: how to stop harming the  
44  
45 healthy. *Br Med J*. 2012;344:e3502.
- 46  
47 3. Glasziou P, Moynihan R, Richards T, Godlee F. Too much medicine; too little care. *Br*  
48  
49 *Med J*. 2013;347:f4247.
- 50  
51  
52  
53  
54  
55  
56  
57  
58  
59  
60

- 1  
2  
3  
4  
5  
6  
7  
8 4. Malhotra A, Maughan D, Ansell J, et al. Choosing Wisely in the UK: the Academy of  
9 Medical Royal Colleges' initiative to reduce the harms of too much medicine. *Br Med J*.  
10 2015;350:h2308.  
11  
12
- 13  
14 5. Calderwood C. Chief Medical Officer's annual report 2014-15. 2016.  
15 <http://www.gov.scot/Publications/2016/01/3745/0>  
16  
17
- 18 6. Hersch J, Jansen J, Barratt A, et al. Women's views on overdiagnosis in breast cancer  
19 screening: a qualitative study. *Br Med J*. 2013;346:f158.  
20  
21
- 22  
23 7. Waller J, Douglas E, Whitaker KL, Wardle J. Women's responses to information about  
24 overdiagnosis in the UK breast cancer screening programme: a qualitative study. *BMJ*  
25 *Open*. 2013;3:e002703.  
26  
27
- 28  
29 8. McCaffery KJ, Jansen J, Scherer LD, et al. Walking the tightrope: communicating  
30 overdiagnosis in modern healthcare. *Br Med J*. 2016;352:i348.  
31  
32
- 33  
34 9. Ghanouni A, Meisel SF, Renzi C, Wardle J, Waller J. Public definitions of the term  
35 'overdiagnosis' in the UK. *BMJ Open*. 2016;;e010723.  
36  
37
- 38  
39 10. Hersch J, Jansen J, Barratt A, et al. Overdetection in breast cancer screening:  
40 development and preliminary evaluation of a decision aid. *BMJ Open*. 2014;4:e006016.  
41  
42
- 43  
44 11. Moynihan R, Nickel B, Hersch J, et al. What do you think overdiagnosis means? A  
45 qualitative analysis of responses from a national community survey of Australians. *BMJ*  
46 *Open*. 2015;5:e007436.  
47  
48
- 49  
50 12. Moynihan R, Nickel B, Hersch J, et al. Public opinions about overdiagnosis: a national  
51 community survey. *PLoS One*. 2015;10:e0125165.  
52  
53  
54  
55  
56  
57  
58  
59  
60

- 1  
2  
3  
4  
5  
6  
7  
8 13. NHS Breast Screening Programme. NHS Breast Screening: Helping you decide. 2013.  
9 Available from:  
10 [https://www.gov.uk/government/uploads/system/uploads/attachment\\_data/file/440798/nh](https://www.gov.uk/government/uploads/system/uploads/attachment_data/file/440798/nhsbsp.pdf)  
11 [sbsp.pdf](https://www.gov.uk/government/uploads/system/uploads/attachment_data/file/440798/nhsbsp.pdf)  
12  
13  
14  
15
- 16 14. Burford D, Austoker J, Kirby M. PSA (prostate specific antigen) testing for prostate  
17 cancer. An information sheet for men considering a PSA test. 2009.  
18
- 19 15. Ghanouni A, Renzi C, McBride E, Waller J. Comparing perceived clarity of information  
20 on overdiagnosis used for breast and prostate cancer screening in England: an  
21 experimental survey. *BMJ Open*. 2017;7:e015955.  
22  
23  
24  
25
- 26 16. National Readership Survey. Social grade. [http://www.nrs.co.uk/nrs-print/lifestyle-and-](http://www.nrs.co.uk/nrs-print/lifestyle-and-classification-data/social-grade/)  
27 [classification-data/social-grade/](http://www.nrs.co.uk/nrs-print/lifestyle-and-classification-data/social-grade/) Accessed: 1<sup>st</sup> December 2017.  
28  
29  
30
- 31 17. Weinstein ND. The precaution adoption process. *Health Psychol*. 1988;7:355–86.  
32
- 33 18. Forbes LJ, Ramirez AJ, Expert group on Information about Breast Screening. Offering  
34 informed choice about breast screening. *J Med Screen*. 2014;21:194–200.  
35  
36  
37
- 38 19. Fage-Butler AM, Nisbeth Jensen M. Medical terminology in online patient-patient  
39 communication: evidence of high health literacy? *Health Expect*. 2016;19:643–53.  
40  
41
- 42 20. Public Health England. PSA testing and prostate cancer: advice for well men aged 50  
43 and over. 2016. Available from:  
44 [https://www.gov.uk/government/uploads/system/uploads/attachment\\_data/file/509191/P](https://www.gov.uk/government/uploads/system/uploads/attachment_data/file/509191/Patient_info_sheet.pdf)  
45 [atient\\_info\\_sheet.pdf](https://www.gov.uk/government/uploads/system/uploads/attachment_data/file/509191/Patient_info_sheet.pdf)  
46  
47  
48  
49  
50  
51  
52  
53  
54  
55  
56  
57  
58  
59  
60

# BMJ Open

## Improving public understanding of 'overdiagnosis' in England: a population survey assessing familiarity with possible terms for labelling the concept and perceptions of appropriate terminology

|                                 |                                                                                                                                                                                                                                                           |
|---------------------------------|-----------------------------------------------------------------------------------------------------------------------------------------------------------------------------------------------------------------------------------------------------------|
| Journal:                        | <i>BMJ Open</i>                                                                                                                                                                                                                                           |
| Manuscript ID                   | bmjopen-2017-021260.R1                                                                                                                                                                                                                                    |
| Article Type:                   | Research                                                                                                                                                                                                                                                  |
| Date Submitted by the Author:   | 02-Mar-2018                                                                                                                                                                                                                                               |
| Complete List of Authors:       | Ghanouni, Alex; University College London, Research Department of Behavioural Science and Health<br>Renzi, Cristina; UCL, Research Department of Behavioural Science and Health<br>Waller, Jo; UCL, Research Department of Behavioural Science and Health |
| <b>Primary Subject Heading</b>: | Communication                                                                                                                                                                                                                                             |
| Secondary Subject Heading:      | Epidemiology, Public health, Health services research                                                                                                                                                                                                     |
| Keywords:                       | EPIDEMIOLOGY, PUBLIC HEALTH, Health policy < HEALTH SERVICES ADMINISTRATION & MANAGEMENT                                                                                                                                                                  |
|                                 |                                                                                                                                                                                                                                                           |

SCHOLARONE™  
Manuscripts

Only

**FULL TITLE PAGE**

**Title:** Improving public understanding of 'overdiagnosis' in England: a population survey assessing familiarity with possible terms for labelling the concept and perceptions of appropriate terminology

**Manuscript type:** Research article

Authors:

Alex Ghanouni<sup>a</sup> a.ghanouni@ucl.ac.uk

Cristina Renzi<sup>a</sup> c.renzi@ucl.ac.uk

Jo Waller<sup>ab</sup> j.waller@ucl.ac.uk | Tel: +44 (0)20 7679 5958 | Fax: +44 (0)20 7679 8354

Affiliations:

<sup>a</sup>Research Department of Behavioural Science and Health, University College London, Gower Street, London, WC1E 6BT, United Kingdom

<sup>b</sup>Corresponding author

**Word count:** Abstract: 299/300; Body: 3,332/4,000; References: 23; Tables or figures: 5

**ABSTRACT**

*Objectives:* Communicating the concept of 'overdiagnosis' to lay individuals is challenging, partly because the term itself is confusing. This study tested whether alternative descriptive labels may be more appropriate.

*Design:* Questionnaire preceded by a description of overdiagnosis.

*Setting:* Home-based, computer-assisted face-to-face survey.

*Participants:* 2,111 adults aged 18 to 70 years in England recruited using random location sampling by a survey company. Data from 1,888 participants were analysed after exclusions due to missing data.

*Interventions:* Participants were given one of two pieces of text describing overdiagnosis, allocated at random, adapted from NHS breast and prostate cancer screening leaflets.

*Primary and secondary outcome measures:* Main outcomes were which of several available terms (e.g. 'overdetection') participants had previously encountered and which they endorsed as applicable labels for the concept described. Demographics and previous exposure to screening information were also measured. Main outcomes were summarised with descriptive statistics. Predictors of previously encountering at least one term, or endorsing at least one as making sense, were assessed using binary logistic regression.

*Results:* 58.0% of participants had not encountered any suggested term; 44.0% did not endorse any as applicable labels. No term was notably familiar; the proportion of participants who had previously encountered each term ranged from 15.9 to 28.3%. Each term was only endorsed as applicable by a minority (range: 27.6% to 40.4%). Notable predictors of familiarity included

1  
2  
3  
4  
5  
6  
7  
8 education, age, and ethnicity; participants were less likely to have encountered terms if they  
9 were older, not White British or had less education, Findings were similar for both pieces of  
10 information.  
11  
12

13  
14 *Conclusions:* Familiarity with suggested terms for overdiagnosis and levels of endorsement  
15 were low and no clear alternative labels for the concept were identified, suggesting that  
16 changing terminology alone would do little to improve understanding, particularly for some  
17 population groups. Explicit descriptions may be more effective.  
18  
19  
20

21  
22 **Keywords:** Decision Making; Surveys and Questionnaires; Early Detection of Cancer; Mass  
23 Screening; Medical Overuse  
24  
25  
26

#### 27 **Strengths and limitations of this study**

- 28 • This study assessed familiarity and perceived appropriateness of a broad range of  
29 possible terms for the concept of 'overdiagnosis' among a large, representative  
30 sample of the general public in England.  
31  
32
- 33 • The concept was described based on information that was widely used by the  
34 National Health Service in England, maintaining generalisability.  
35  
36
- 37 • The list of possible terms was not exhaustive; more suitable alternative labels may  
38 have been omitted.  
39  
40
- 41 • Results may be time-dependent: ongoing communication initiatives may change  
42 perceptions of appropriate terms for the concept of 'overdiagnosis'.  
43  
44  
45

#### 46 47 **INTRODUCTION** 48 49 50 51 52 53 54 55 56 57 58 59 60

1  
2  
3  
4  
5  
6  
7  
8 There is growing concern among healthcare providers and policymakers about the potential for  
9 medical tests to detect asymptomatic disease that would never have become clinically apparent  
10 or resulted in death (1). 'Overdiagnosis' can harm, primarily via the subsequent risks and costs  
11 associated with unnecessary treatment but also via opportunity costs to a healthcare service  
12 due to overuse of scarce resources (2). Various initiatives have aimed to propagate  
13 understanding of the concept among patients and the public so that they can make better  
14 informed decisions about their health (e.g. 3–5). However, previous studies have found that the  
15 concept is challenging to communicate to lay people (e.g. in the context of breast cancer  
16 screening; 6,7).

17  
18  
19  
20  
21  
22  
23  
24  
25 Little is known about how to improve communication of overdiagnosis (8). One barrier is that the  
26 term 'overdiagnosis' itself may be confusing and counterintuitive. For example, a previous study  
27 in the UK asked members of the public to give their interpretation of what the word meant; a  
28 large proportion of participants gave definitions that did not match the concept but resembled  
29 other similar words (e.g. 'providing an incorrect diagnosis' since 'overdiagnosis' resembles  
30 'misdiagnosis'; 9). Equivalent findings have been reported by a previous survey in Australia (10).  
31 In addition, a focus group study undertaken as part of the development of a decision aid for  
32 breast screening found that 'overdiagnosis' was not understood intuitively and that  
33 'overdetection' may be clearer (11).

34  
35  
36  
37  
38  
39  
40  
41  
42 These findings suggest that the term 'overdiagnosis' does not clearly reflect its intended  
43 meaning for the general public and that other terms (such as 'overdetection') may be more  
44 appropriate. Hence, this study asked a large sample of the public in England to appraise  
45 descriptions of the concept and tested which of several possible terms people thought made  
46 sense as labels (i.e. endorsement). Alternatives included 'overdetection' or 'unnecessary  
47  
48  
49  
50  
51  
52  
53  
54  
55  
56  
57  
58  
59  
60

1  
2  
3  
4  
5  
6  
7  
8 diagnosis' (11) as well as terms related to unnecessary therapy (e.g. 'overtreatment') and terms  
9 that were less technically accurate but still had the potential to be seen as applicable (e.g. 'false  
10 positives'; 9, 10). A limitation to the utility of 'overdiagnosis' as a label may be the currently low  
11 level of public awareness of the term (9, 12). Consequently, this study also measured which  
12 terms people had encountered before (i.e. familiarity) to test whether any alternatives were  
13 notably more familiar. We also explored whether participant characteristics were associated with  
14 having previously encountered these terms, or with endorsing them as making sense, as this  
15 may aid targeted communication efforts.  
16  
17  
18  
19  
20  
21  
22

23 Information was derived from materials that have been widely used by the NHS Breast  
24 Screening Programme (13) and the Prostate Cancer Risk Management Programme (14). The  
25 study was carried out as part of Wave 3 of the Attitudes, Behaviour and Cancer UK Survey  
26 (ABACUS). Other studies arising from this survey have also been published (e.g. 15).  
27  
28  
29  
30

## 31 **METHODS**

### 32 **Design**

33  
34  
35 Institutional approval was granted by the University College London Research Ethics  
36 Committee (5771/002). The focus of the present study was on appropriate terminology for  
37 widely used descriptions of overdiagnosis. However, the ABACUS survey was a broader piece  
38 of work that also compared the perceived clarity of different forms of overdiagnosis information.  
39 Hence, elements of the design and measures have also been reported elsewhere (15). Face-to-  
40 face computer-assisted interviews were conducted by TNS (a market research company) as  
41 part of a weekly omnibus survey and took place in participants' homes between April and May  
42 2016. Participants were informed:  
43  
44  
45  
46  
47  
48  
49  
50  
51  
52  
53  
54  
55  
56  
57  
58  
59  
60

1  
2  
3  
4  
5  
6  
7  
8 *“We would now like to ask you some questions about leaflets on health-related topics. The NHS*  
9 *offers people a variety of screening tests to check for illnesses before symptoms have*  
10 *appeared. People offered an NHS screening test are often given a leaflet that explains the risks*  
11 *and benefits of having the test. The leaflet is either posted or given out by a doctor or nurse.”*  
12  
13  
14  
15

16 Participants then received information on overdiagnosis adapted from written material used by  
17 the NHS in England as part of either i) the Breast Screening Programme or ii) the Prostate  
18 Cancer Risk Management Programme as they existed in February 2016 (neither of which used  
19 a specific label), allocated at random in a 1:1 ratio:  
20  
21  
22  
23

24 *“The test can find an illness that would never have caused a person harm. Some people will be*  
25 *diagnosed and treated for an illness that would never otherwise have been found and would not*  
26 *have become life-threatening.”* From the breast screening information leaflet (13)  
27  
28  
29

30 *“The test may make you worry by finding an illness that may never cause any symptoms or*  
31 *shorten your life.”* From the prostate screening information leaflet (14)  
32  
33  
34

35 The Breast Screening Programme in England offers triennial mammography to all women  
36 between the ages of 50 to 70 years and registered with a General Practitioner. The Prostate  
37 Screening Risk Management Programme allows men aged 50 years or older to have a Prostate  
38 Specific Antigen test by requesting it from their GP after discussing the risks and benefits.  
39  
40

41 References to cancer were removed so that findings could be generalised to beyond these two  
42 specific screening contexts.  
43  
44  
45

## 46 **Participants**

47

48 Participants were members of the public in England aged 18 to 70 years. National  
49 representativeness was sought via a two-stage process. In the first instance, random location  
50  
51  
52  
53  
54  
55  
56  
57  
58  
59  
60

1  
2  
3  
4  
5  
6  
7  
8 sampling was carried out using the Postcode Address File and Census statistics. Within each  
9  
10 selected location, participant quotas were set based on demographic characteristics (i.e. age,  
11  
12 gender, employment status, and presence of children in the home).

### 13 14 **Measures**

15  
16  
17 Demographics: Relevant measures consisted of age, gender, ethnicity, social grade (16),  
18  
19 marital status, highest level of education obtained, personal history of cancer (*"Have you ever*  
20  
21 *been diagnosed with cancer?"*; "yes" or "no"), and whether anyone they know had been  
22  
23 diagnosed with cancer (*"Has anyone close to you ever been diagnosed with cancer?"*; "yes",  
24  
25 "no", or "don't know").

26  
27 Familiarity with screening information: Participants were asked whether they had ever  
28  
29 previously received information about screening (for cancer or other illnesses) via i) reading a  
30  
31 leaflet from the NHS, ii) reading an NHS website, and iii) talking with a doctor or nurse  
32  
33 (response options: "yes", "no", "not sure").

34  
35 If participants were eligible for cancer screening and had not been diagnosed with the target  
36  
37 disease, they were asked about their previous participation (e.g. only women aged 47-70 years  
38  
39 without a breast cancer diagnosis were asked about breast screening participation) via items  
40  
41 designed using the Precaution Adoption Process Model (PAPM; 17), a stage theory of  
42  
43 protective health behaviour. This measures whether participants have heard of a particular type  
44  
45 of screening, whether they have heard of a type of screening but have never been invited,  
46  
47 whether they have been invited but never participated, whether they have participated but not  
48  
49 consistently, and whether they have participated consistently. Eligibility criteria and exact  
50  
51 question wording for assessing experience have been reported elsewhere (15).  
52  
53  
54  
55  
56  
57  
58  
59  
60

1  
2  
3  
4  
5  
6  
7  
8 Perceived clarity of information: After reading the information allocated at random, participants  
9  
10 were asked, "How clear do you find this description of a risk of the test?" with available  
11 responses of "extremely clear", "very clear", "moderately clear", "slightly clear", and "not at all  
12 clear". This was followed by a question on whether they had read or heard similar information  
13 about a screening test before (possible responses were: "yes", "no", and "not sure").  
14  
15

16  
17  
18 Main outcomes: The first main outcome measure (endorsement) consisted of "Does this term  
19 make sense to you as a way of describing this risk of a screening test?", followed by seven  
20 terms: "overdiagnosis", "overdetection", "unnecessary diagnosis", "overtreatment", "unnecessary  
21 treatment", "false positive diagnosis", and "false positive test results"<sup>1</sup> (responses: "yes", "no").  
22

23  
24 Suggested terms were based on previous literature (e.g. 11) and discussion among the  
25 research team.  
26  
27

28  
29 The second outcome measure (familiarity) was: "Have you ever seen or heard any of the  
30 previous seven terms before today?" and if participants responded "yes", they were asked  
31 which out of the previous terms (responses: "yes", "no", "not sure").  
32  
33

34  
35 Ancillary measures: The measures used in this study were part of the broader ABACUS survey.  
36 Most of the items in this study were presented at the start of the survey and so the effects of  
37 priming from unrelated items were expected to be minimal. In order, the full survey included:  
38 questions on decision-making style and previous exposure to cancer screening information,  
39  
40  
41  
42  
43

---

44  
45  
46 <sup>1</sup> Participants were also asked, "Can you think of any other terms to describe this risk that would  
47 make sense to you?". However, only approximately 60 responses suggesting potentially  
48 applicable terms were recorded across all participants (e.g. "oversensitivity", "unknown  
49 diagnosis"), of which most were mentioned just once and so no further analysis was attempted.  
50  
51  
52  
53  
54  
55  
56  
57  
58  
59  
60

1  
2  
3  
4  
5  
6  
7  
8 information on overdiagnosis adapted from screening leaflets, questions on perceived clarity of  
9 this information, previous exposure to similar information, the main study outcomes, and help-  
10 seeking behaviour in relation to cancer screening, followed by more questions on self-rated  
11 health, questions on cancer diagnoses, perceived cancer risk, screening behaviour in relation to  
12 each of the applicable programmes (cervical, breast, bowel, prostate), and educational level.  
13  
14  
15  
16

### 17 **Public Involvement**

18  
19  
20 Public involvement consisted of input into the design of the study and development of measures  
21 via pilot testing of the survey. This comprised two stages: first, a series of telephone cognitive  
22 interviews (18) was used to determine whether items could be understood by lay people (n=11)  
23 and that the survey was not overly burdensome. Participants were asked for feedback on any  
24 items they found difficult to understand or answer and the survey was revised accordingly.  
25  
26  
27  
28  
29 Second, a web-based version of the survey was pilot-tested with 431 participants.  
30  
31

32 There are currently no plans to disseminate the results to study participants.  
33

### 34 **Analysis**

35  
36  
37 Participants were excluded if they declined to answer any of the measures included in this  
38 study. Ethnicity and marital status were dichotomised into "White British" and "other ethnic  
39 groups", and "single, widowed, divorced or separated" and "married or living as a couple",  
40 respectively. Social class grade was categorised as "grades A or B", "grades C1 or C2", and  
41 "grades D or E". Education was coded based on Levels 1-4 from the Office of National Statistics  
42 (19) or "Other" for non-ordinal levels of education such as professional qualifications.  
43  
44  
45  
46  
47  
48

49 Sample characteristics were summarised with descriptive statistics. We report the percentages  
50 of participants (with binomial 95% confidence intervals) who had i) previously encountered and  
51  
52  
53  
54  
55  
56  
57  
58  
59  
60

1  
2  
3  
4  
5  
6  
7  
8 ii) endorsed each possible number of terms (from 0 to 7 in both cases), and the percentages of  
9 participants who had previously encountered and endorsed each specific term.

10  
11 Responses to i) and ii) were also recoded into “previously seen or heard one or more terms”  
12 (familiarity) and “endorsed one or more terms as making sense to them” (endorsement) for  
13 further evaluation e.g. “was familiar with at least one term” vs. “was not familiar” (including  
14 responses of “not sure”). Two exploratory logistic regression models tested the null hypothesis  
15 that predictor variables were unrelated to either of these outcomes. In both models, predictor  
16 variables consisted of demographic characteristics, familiarity with screening information, the  
17 overdiagnosis information condition (breast vs. prostate), and perceived clarity. In addition, each  
18 model included the outcome from the other as a predictor (e.g. the endorsement model included  
19 familiarity as a potential predictor variable). Variance Inflation Factors were small (all <2.969  
20 and <2.972, respectively), indicating that (multi)collinearity was limited and a Box-Tidwell  
21 procedure found little evidence to suggest that the age variable violated the assumption of  
22 linearity (p-values: .110 and .508). Adjusted odds-ratios (ORs), accompanying 95% CIs, and p-  
23 values for having previously seen or heard one or more terms before and endorsing one or  
24 more term as making sense are reported alongside descriptive statistics.  
25  
26  
27  
28  
29  
30  
31  
32  
33  
34  
35  
36  
37

## 38 **RESULTS**

### 39 **Participant characteristics**

40  
41 After excluding 223 participants with missing data, 1,888 cases were analysed. Sample  
42 characteristics are presented in Table 1. Mean age was 43.6 years (standard deviation: 15.7).  
43  
44  
45  
46  
47

### 48 **Familiarity with terms**

1  
2  
3  
4  
5  
6  
7  
8 Table 2 illustrates that the majority of participants (58.0%) were not familiar with any of the listed  
9 terms. However, the second most common number of terms recognised as familiar was all  
10 seven (12.3%). The percentages of participants previously encountering between one and six  
11 terms ranged from 1.1% to 9.4%. Table 2 also shows that the percentages of participants who  
12 had encountered each specific term ranged from 15.9% (*“overdetection”*) to 28.3% (*“false*  
13 *positive test results”*).  
14  
15  
16  
17  
18

19 Table 3 reports predictors of familiarity with at least one term. Among demographic  
20 characteristics, there was strong evidence against the null hypothesis for ethnicity, education,  
21 and age: White British participants were more likely to be familiar with at least one term  
22 compared with other ethnic groups. Participants with a higher (or ‘other’) level of education were  
23 also more likely to be familiar with one or more terms compared with participants who had no  
24 formal qualifications (or did not know). Older participants were less likely to be familiar with one  
25 or more terms. Participants were also more likely to be familiar with one or more terms if they  
26 knew someone with cancer, had previously read an NHS website about screening, discussed  
27 screening with a doctor or nurse, had previously read or seen similar information, or endorsed  
28 one or more terms as making sense as labels.  
29  
30  
31  
32  
33  
34  
35  
36  
37

38 Finally, there was moderate evidence against the null hypothesis for an association with social  
39 class grade with participants in grades A or B being more likely to be familiar with at least one  
40 term compared with participants in grades D or E.  
41  
42  
43  
44

#### 45 **Terms endorsed as making sense**

46  
47 Table 4 shows that participants most commonly did not endorse any terms as making sense  
48 (44.3%). As with results for familiarity, the second most common number of terms endorsed was  
49 all seven (15.7%). The most commonly endorsed term was *“unnecessary treatment”* (40.4% of  
50  
51  
52  
53  
54  
55  
56  
57  
58  
59  
60

1  
2  
3  
4  
5  
6  
7  
8 participants in the sample endorsed this term overall; 41.4% and 39.3% after being given the  
9 breast and prostate information, respectively). Endorsement of other terms ranged from 27.9%  
10 (“*overdetection*”) to 35.4% (“*unnecessary diagnosis*”) for information from breast screening and  
11  
12 27.4% (“*overdetection*”) to 36.6% (“*false positive test results*”) for information from prostate  
13  
14 screening.  
15  
16

17  
18 Other than familiarity (Table 3), the logistic regression analysis of predictors of endorsement  
19 only showed strong evidence against the null hypothesis for gender and knowing someone with  
20 cancer: males and participants who knew someone diagnosed with cancer were more likely to  
21 endorse at least one term as making sense (Table 5).  
22  
23  
24  
25  
26  
27  
28  
29  
30  
31  
32  
33  
34  
35  
36  
37  
38  
39  
40  
41  
42  
43  
44  
45  
46  
47  
48  
49  
50  
51  
52  
53  
54  
55  
56  
57  
58  
59  
60

Table 1 – Characteristics of the sample

|                                                     |       | Total N=1,888 |  |
|-----------------------------------------------------|-------|---------------|--|
| Characteristic                                      | n     | (%)           |  |
| <b>Overdiagnosis information</b>                    |       |               |  |
| Breast screening text                               | 987   | (52.3)        |  |
| Prostate screening text                             | 901   | (47.7)        |  |
| <b>Gender</b>                                       |       |               |  |
| Male                                                | 879   | (46.6)        |  |
| Female                                              | 1,009 | (53.4)        |  |
| <b>Ethnicity</b>                                    |       |               |  |
| White British                                       | 1,432 | (75.8)        |  |
| Other ethnic groups                                 | 456   | (24.2)        |  |
| <b>Marital status</b>                               |       |               |  |
| Married or living as a couple                       | 1,133 | (60.0)        |  |
| Single, widowed, divorced, or separated             | 755   | (40.0)        |  |
| <b>Highest level of education<sup>1</sup></b>       |       |               |  |
| No formal qualifications                            | 281   | (14.9)        |  |
| Approximately Level 1, 2, or 3                      | 890   | (47.1)        |  |
| Approximately Level 4                               | 507   | (26.9)        |  |
| Other                                               | 199   | (10.5)        |  |
| Don't know/Not sure                                 | 11    | (0.6)         |  |
| <b>Social class grade<sup>2</sup></b>               |       |               |  |
| Grade A or B                                        | 386   | (20.4)        |  |
| Grade C1 or C2                                      | 931   | (49.3)        |  |
| Grade D or E                                        | 571   | (30.2)        |  |
| <b>Personal diagnosis of cancer</b>                 |       |               |  |
| Yes                                                 | 98    | (5.2)         |  |
| No                                                  | 1,790 | (94.8)        |  |
| <b>Knows someone with cancer</b>                    |       |               |  |
| Yes                                                 | 1,113 | (59.0)        |  |
| No                                                  | 771   | (40.8)        |  |
| Don't know/Not sure                                 | 4     | (0.2)         |  |
| <b>Any previous cervical screening experience</b>   |       |               |  |
| Yes                                                 | 652   | (34.5)        |  |
| No                                                  | 226   | (12.0)        |  |
| Not eligible                                        | 1,010 | (53.5)        |  |
| <b>Any previous breast screening experience</b>     |       |               |  |
| Yes                                                 | 317   | (16.8)        |  |
| No                                                  | 83    | (4.4)         |  |
| Not eligible                                        | 1,488 | (78.8)        |  |
| <b>Any previous bowel screening experience</b>      |       |               |  |
| Yes                                                 | 293   | (15.5)        |  |
| No                                                  | 181   | (9.6)         |  |
| Not eligible                                        | 1,414 | (74.9)        |  |
| <b>Any previous prostate screening experience</b>   |       |               |  |
| Yes                                                 | 77    | (4.1)         |  |
| No                                                  | 344   | (18.2)        |  |
| Not eligible                                        | 1,467 | (77.7)        |  |
| <b>Previously read a screening leaflet</b>          |       |               |  |
| Yes                                                 | 1,058 | (56.0)        |  |
| No                                                  | 809   | (42.8)        |  |
| Don't know/Not sure                                 | 21    | (1.1)         |  |
| <b>Previously read an NHS screening website</b>     |       |               |  |
| Yes                                                 | 324   | (17.2)        |  |
| No                                                  | 1,549 | (82.0)        |  |
| Don't know/Not sure                                 | 15    | (0.8)         |  |
| <b>Discussed screening with doctor/nurse</b>        |       |               |  |
| Yes                                                 | 624   | (33.1)        |  |
| No                                                  | 1,251 | (66.3)        |  |
| Don't know/Not sure                                 | 13    | (0.7)         |  |
| <b>Previously read or heard similar information</b> |       |               |  |
| Yes                                                 | 662   | (35.1)        |  |

|   |                                         |       |        |
|---|-----------------------------------------|-------|--------|
| 1 | No                                      | 1,185 | (62.8) |
| 2 | Don't know/Not sure                     | 41    | (2.2)  |
| 3 | <b>Perceived clarity of information</b> |       |        |
| 4 | Extremely clear                         | 170   | (9.0)  |
| 5 | Very clear                              | 636   | (33.7) |
| 6 | Moderately clear                        | 685   | (36.3) |
| 7 | Slightly clear                          | 206   | (10.9) |
| 8 | Not at all clear                        | 191   | (10.1) |

8 <sup>1</sup>Level 1-3 qualifications include e.g. GCSEs and A Levels; Level 4

9 qualifications include degrees and higher degrees

10 <sup>2</sup>Social grades are based on occupation (e.g. Grade A includes

11 managerial roles; Grade E includes casual workers)

For peer review only

Table 2 – Number of participants (and percentages and 95% CIs) previously encountering i) each number of possible terms and ii) each specific term. Participants receiving overdiagnosis information based on the Breast Screening programme or the Prostate Cancer Risk Management Programme were analysed separately.

|                       |        | Number of terms previously encountered: n, %, 95% CIs                                 |               |               |                       |               |                       |                          |                            |
|-----------------------|--------|---------------------------------------------------------------------------------------|---------------|---------------|-----------------------|---------------|-----------------------|--------------------------|----------------------------|
| Screening information | Total  | 0                                                                                     | 1             | 2             | 3                     | 4             | 5                     | 6                        | 7                          |
| Breast                | n (%)  | 583 (59.1)                                                                            | 73 (7.4)      | 76 (7.7)      | 53 (5.4)              | 41 (4.2)      | 28 (2.8)              | 9 (0.9)                  | 124 (12.6)                 |
| N=987                 | 95% CI | 56.0 to 62.1                                                                          | 5.9 to 9.2    | 6.2 to 9.5    | 4.1 to 6.9            | 3.0 to 5.5    | 1.9 to 4.0            | 0.5 to 1.7               | 10.6 to 14.7               |
| Prostate              | n (%)  | 512 (56.8)                                                                            | 64 (7.1)      | 101 (11.2)    | 47 (5.2)              | 37 (4.1)      | 19 (2.1)              | 12 (1.3)                 | 109 (12.1)                 |
| n=901                 | 95% CI | 53.6 to 60.0                                                                          | 5.6 to 8.9    | 9.3 to 13.4   | 3.9 to 6.8            | 3.0 to 5.6    | 1.3 to 3.2            | 0.7 to 2.2               | 10.1 to 14.3               |
| Total                 | n (%)  | 1,095 (58.0)                                                                          | 137 (7.3)     | 177 (9.4)     | 100 (5.3)             | 78 (4.1)      | 47 (2.5)              | 21 (1.1)                 | 233 (12.3)                 |
| N=1,888               | 95% CI | 55.8 to 60.2                                                                          | 6.2 to 8.5    | 8.1 to 10.8   | 4.4 to 6.4            | 3.3 to 4.1    | 1.9 to 3.3            | 0.7 to 1.7               | 10.9 to 13.9               |
|                       |        | <i>"Which of the following term or terms had you heard of before?": n, %, 95% CIs</i> |               |               |                       |               |                       |                          |                            |
| Screening information | Total  | Not sure                                                                              | Overdiagnosis | Overdetection | Unnecessary diagnosis | Overtreatment | Unnecessary treatment | False positive diagnosis | False positive test result |
| Breast                | n (%)  | 7 (0.7)                                                                               | 215 (21.8)    | 163 (16.5)    | 214 (21.7)            | 225 (22.8)    | 280 (28.4)            | 243 (24.6)               | 270 (27.4)                 |
| N=987                 | 95% CI | 0.3 to 1.4                                                                            | 19.3 to 24.4  | 14.3 to 18.9  | 19.2 to 24.3          | 20.3 to 25.5  | 25.6 to 31.2          | 22.0 to 27.4             | 24.6 to 30.2               |
| Prostate              | n (%)  | 14 (1.6)                                                                              | 196 (21.8)    | 137 (15.2)    | 216 (24.0)            | 186 (20.6)    | 253 (28.1)            | 232 (25.7)               | 265 (29.4)                 |
| n=901                 | 95% CI | 0.9 to 2.5                                                                            | 19.2 to 24.5  | 13.0 to 17.7  | 21.3 to 26.8          | 18.1 to 23.4  | 25.2 to 31.1          | 23.0 to 28.7             | 26.5 to 32.4               |
| Total                 | n (%)  | 21 (1.1)                                                                              | 411 (21.8)    | 300 (15.9)    | 430 (22.8)            | 411 (21.8)    | 533 (28.2)            | 475 (25.2)               | 535 (28.3)                 |
| N=1,888               | 95% CI | 0.7 to 1.7                                                                            | 20.0 to 23.7  | 14.3 to 17.6  | 20.9 to 24.7          | 20.0 to 23.7  | 26.2 to 30.3          | 23.2 to 27.2             | 26.3 to 30.4               |

Table 3 – Familiarity with one or more vs. no terms: descriptive statistics, adjusted ORs, 95% CIs, and p-values for variables in the multivariable binary logistic regression model

| Characteristic                                                                              | Total<br>(N=1,888) | Familiarity with no terms vs. at least one term: n (%) |                                     | Adjusted OR, 95% CI | p-value                   |
|---------------------------------------------------------------------------------------------|--------------------|--------------------------------------------------------|-------------------------------------|---------------------|---------------------------|
|                                                                                             |                    | No term<br>(n=1,095; 58.0%)                            | At least one term<br>(n=793; 42.0%) |                     |                           |
| <b>Overdiagnosis information</b>                                                            |                    |                                                        |                                     |                     |                           |
| Breast screening text vs. Prostate screening text                                           | 987                | 583 (59.1)                                             | 404 (40.9)                          | 0.87, 0.70 to 1.09  | .224                      |
| <b>Gender</b>                                                                               |                    |                                                        |                                     |                     |                           |
| Male vs. Female                                                                             | 879                | 534 (60.8)                                             | 345 (39.2)                          | 1.00, 0.79 to 1.26  | .998                      |
| <b>Ethnicity</b>                                                                            |                    |                                                        |                                     |                     |                           |
| White British vs. Other ethnic groups                                                       | 1,432              | 775 (54.1)                                             | 657 (45.9)                          | 2.14, 1.61 to 2.84  | <b>&lt;.0005</b>          |
| <b>Marital status</b>                                                                       |                    |                                                        |                                     |                     |                           |
| Married or living as a couple vs. Single, widowed, divorced, or separated                   | 1,133              | 661 (58.3)                                             | 472 (41.7)                          | 0.87, 0.69 to 1.09  | .216                      |
| <b>Highest level of education</b>                                                           |                    |                                                        |                                     |                     |                           |
| Other levels                                                                                | 199                | 116 (58.3)                                             | 83 (41.7)                           | 2.32, 1.46 to 3.68  | Overall: <b>&lt;.0005</b> |
| Approximately Level 4                                                                       | 507                | 219 (43.2)                                             | 288 (56.8)                          | 4.17, 2.75 to 6.33  | <b>&lt;.0005</b>          |
| Approximately Level 1, 2, or 3                                                              | 890                | 532 (59.8)                                             | 358 (40.2)                          | 2.19, 1.52 to 3.15  | <b>&lt;.0005</b>          |
| vs. No formal qualifications or don't know                                                  | 292                | 228 (78.1)                                             | 64 (21.9)                           |                     |                           |
| <b>Social class grade</b>                                                                   |                    |                                                        |                                     |                     |                           |
| Grade A or B vs. Grade C1 or C2 vs. Grade D or E                                            | 386                | 170 (44.0)                                             | 216 (56.0)                          | 1.54, 1.09 to 2.17  | Overall: <b>.050</b>      |
|                                                                                             | 931                | 542 (58.2)                                             | 389 (41.8)                          | 1.19, 0.91 to 1.55  | <b>.014</b>               |
|                                                                                             | 571                | 383 (67.1)                                             | 188 (32.9)                          |                     | <b>.201</b>               |
| <b>Personal diagnosis of cancer</b>                                                         |                    |                                                        |                                     |                     |                           |
| Yes vs. No                                                                                  | 98                 | 49 (50.0)                                              | 49 (50.0)                           | 1.10, 0.68 to 1.80  | .690                      |
|                                                                                             | 1,790              | 1,046 (58.4)                                           | 744 (41.6)                          |                     |                           |
| <b>Knows someone with cancer</b>                                                            |                    |                                                        |                                     |                     |                           |
| Yes vs. No or don't know                                                                    | 1,113              | 562 (50.5)                                             | 551 (49.5)                          | 1.50, 1.19 to 1.89  | <b>.001</b>               |
|                                                                                             | 775                | 533 (68.8)                                             | 242 (31.2)                          |                     |                           |
| <b>Previously read a screening leaflet</b>                                                  |                    |                                                        |                                     |                     |                           |
| Yes vs. No or not sure                                                                      | 1,058              | 535 (50.6)                                             | 523 (49.4)                          | 1.27, 0.97 to 1.66  | .089                      |
|                                                                                             | 830                | 560 (67.5)                                             | 270 (32.5)                          |                     |                           |
| <b>Previously read an NHS screening website</b>                                             |                    |                                                        |                                     |                     |                           |
| Yes vs. No or not sure                                                                      | 324                | 125 (38.6)                                             | 199 (61.4)                          | 1.45, 1.07 to 1.97  | <b>.016</b>               |
|                                                                                             | 1,564              | 970 (62.0)                                             | 594 (38.0)                          |                     |                           |
| <b>Discussed screening with doctor/nurse</b>                                                |                    |                                                        |                                     |                     |                           |
| Yes vs. No                                                                                  | 624                | 276 (44.2)                                             | 348 (55.8)                          | 1.34, 1.03 to 1.74  | <b>.030</b>               |
|                                                                                             | 1,264              | 819 (64.8)                                             | 445 (35.2)                          |                     |                           |
| <b>Previously read or heard similar information</b>                                         |                    |                                                        |                                     |                     |                           |
| Yes vs. No or not sure                                                                      | 662                | 266 (40.2)                                             | 396 (59.8)                          | 2.30, 1.81 to 2.94  | <b>&lt;.0005</b>          |
|                                                                                             | 1,226              | 829 (67.6)                                             | 397 (32.4)                          |                     |                           |
| <b>Endorsed any term(s) as making sense</b>                                                 |                    |                                                        |                                     |                     |                           |
| Yes vs. No                                                                                  | 1,051              | 426 (40.5)                                             | 625 (59.5)                          | 4.92, 3.94 to 6.17  | <b>&lt;.0005</b>          |
|                                                                                             | 837                | 669 (79.9)                                             | 168 (20.1)                          |                     |                           |
| <b>Perceived clarity of information</b>                                                     |                    |                                                        |                                     |                     |                           |
| Extremely clear vs. Very clear vs. Moderately clear vs. Slightly clear vs. Not at all clear | 170                | 87 (51.2)                                              | 83 (48.8)                           | 0.85, 0.52 to 1.40  | Overall: <b>.534</b>      |
|                                                                                             | 636                | 339 (53.3)                                             | 297 (46.7)                          | 0.97, 0.65 to 1.43  | <b>.525</b>               |
|                                                                                             | 685                | 424 (61.9)                                             | 261 (38.1)                          | 0.78, 0.53 to 1.16  | <b>.860</b>               |
|                                                                                             | 206                | 130 (63.1)                                             | 76 (36.9)                           | 0.92, 0.57 to 1.49  | <b>.225</b>               |
|                                                                                             | 191                | 115 (60.2)                                             | 76 (39.8)                           |                     | <b>.745</b>               |
| <b>Mean (SD)</b>                                                                            |                    |                                                        |                                     |                     |                           |
| <b>Age (in years)</b>                                                                       | 1,888              | 43.8 (15.7)                                            | 43.3 (15.8)                         | 0.99, 0.98 to 1.00  | <b>.003</b>               |

N.B. Adjusted ORs and 95% CIs are relative to a stated reference category except age, which is per unit increase; p-values <.05 are in bold; all predictor variables are included in the model

Table 4 – Number of participants (and percentages and 95% CIs) endorsing i) each number of possible terms and ii) each specific term as making sense to them as a label

|                       |        | Number of terms endorsed as making sense as a way of describing the text: n, %, 95% CIs              |               |                       |               |                       |                          |                             |              |
|-----------------------|--------|------------------------------------------------------------------------------------------------------|---------------|-----------------------|---------------|-----------------------|--------------------------|-----------------------------|--------------|
| Screening information | Total  | 0                                                                                                    | 1             | 2                     | 3             | 4                     | 5                        | 6                           | 7            |
| Breast                | n (%)  | 429 (43.5)                                                                                           | 76 (7.7)      | 86 (8.7)              | 74 (7.5)      | 67 (6.8)              | 58 (5.9)                 | 42 (4.3)                    | 155 (15.7)   |
| n=987                 | 95% CI | 40.4 to 46.6                                                                                         | 6.2 to 9.5    | 7.1 to 10.6           | 6.0 to 9.3    | 5.3 to 8.5            | 4.5 to 7.5               | 3.1 to 5.7                  | 13.5 to 18.1 |
| Prostate              | n (%)  | 408 (45.3)                                                                                           | 59 (6.5)      | 73 (8.1)              | 68 (7.5)      | 66 (7.3)              | 48 (5.3)                 | 37 (4.1)                    | 142 (15.8)   |
| n=901                 | 95% CI | 42.1 to 48.5                                                                                         | 5.1 to 8.3    | 6.5 to 10.0           | 6.0 to 9.4    | 5.8 to 9.2            | 4.0 to 6.9               | 3.0 to 5.6                  | 13.5 to 18.2 |
| Total                 | n (%)  | 837 (44.3)                                                                                           | 135 (7.2)     | 159 (8.4)             | 142 (7.5)     | 133 (7.0)             | 106 (5.6)                | 79 (4.2)                    | 297 (15.7)   |
| N=1,888               | 95% CI | 42.1 to 46.6                                                                                         | 6.1 to 8.4    | 7.2 to 9.7            | 6.4 to 8.8    | 6.0 to 8.3            | 4.6 to 6.7               | 3.4 to 5.2                  | 14.1 to 17.4 |
|                       |        | <i>"Which terms make sense as a way of describing this risk of a screening test?": n, %, 95% CIs</i> |               |                       |               |                       |                          |                             |              |
| Screening information | Total  | Overdiagnosis                                                                                        | Overdetection | Unnecessary diagnosis | Overtreatment | Unnecessary treatment | False positive diagnosis | False positive test results |              |
| Breast                | n (%)  | 334 (33.8)                                                                                           | 275 (27.9)    | 349 (35.4)            | 336 (34.0)    | 409 (41.4)            | 324 (32.8)               | 338 (34.2)                  |              |
| n=987                 | 95% CI | 30.9 to 36.8                                                                                         | 25.1 to 30.7  | 32.4 to 38.4          | 31.1 to 37.0  | 38.4 to 44.5          | 30.0 to 35.8             | 31.3 to 37.2                |              |
| Prostate              | n (%)  | 291 (32.3)                                                                                           | 247 (27.4)    | 307 (34.1)            | 280 (31.1)    | 354 (39.3)            | 320 (35.5)               | 330 (36.6)                  |              |
| n=901                 | 95% CI | 29.3 to 35.4                                                                                         | 24.6 to 30.4  | 31.0 to 37.2          | 28.1 to 34.2  | 36.1 to 42.5          | 32.4 to 38.7             | 33.5 to 39.8                |              |
| Total                 | n (%)  | 625 (33.1)                                                                                           | 522 (27.6)    | 656 (34.7)            | 616 (32.6)    | 763 (40.4)            | 644 (34.1)               | 668 (35.4)                  |              |
| N=1,888               | 95% CI | 31.0 to 35.3                                                                                         | 25.7 to 29.7  | 32.6 to 36.9          | 30.5 to 34.8  | 38.2 to 42.6          | 32.0 to 36.3             | 33.2 to 37.6                |              |

Table 5 – Endorsed one or more vs. no terms as making sense: descriptive statistics, adjusted ORs, 95% CIs, and p-values for variables in the multivariable binary logistic regression model

| Characteristic                                                            | Total<br>(N=1,888) | Endorsed no vs. at least one term as making sense: n (%) |                                       | Adjusted OR, 95% CI | p-value          |
|---------------------------------------------------------------------------|--------------------|----------------------------------------------------------|---------------------------------------|---------------------|------------------|
|                                                                           |                    | No term<br>(n=837; 44.3%)                                | At least one term<br>(n=1,051; 55.7%) |                     |                  |
| <b>Overdiagnosis information</b>                                          |                    |                                                          |                                       |                     |                  |
| Breast screening text vs. Prostate screening text                         | 987<br>901         | 429 (43.5)<br>408 (45.3)                                 | 558 (56.5)<br>493 (54.7)              | 1.16, 0.95 to 1.42  | .148             |
| <b>Gender</b>                                                             |                    |                                                          |                                       |                     |                  |
| Male vs. Female                                                           | 879<br>1,009       | 380 (43.2)<br>457 (45.3)                                 | 499 (56.8)<br>552 (54.7)              | 1.40, 1.13 to 1.74  | <b>.002</b>      |
| <b>Ethnicity</b>                                                          |                    |                                                          |                                       |                     |                  |
| White British vs. Other ethnic groups                                     | 1,432<br>456       | 592 (41.3)<br>245 (53.7)                                 | 840 (58.7)<br>211 (46.3)              | 1.25, 0.97 to 1.61  | .080             |
| <b>Marital status</b>                                                     |                    |                                                          |                                       |                     |                  |
| Married or living as a couple vs. Single, widowed, divorced, or separated | 1,133<br>755       | 500 (44.1)<br>337 (44.6)                                 | 633 (55.9)<br>418 (55.4)              | 1.05, 0.85 to 1.30  | .671             |
| <b>Highest level of education</b>                                         |                    |                                                          |                                       |                     | Overall: .556    |
| Other levels                                                              | 199                | 88 (44.2)                                                | 111 (55.8)                            | 1.21, 0.80 to 1.82  | .374             |
| Approximately Level 4                                                     | 507                | 190 (37.5)                                               | 317 (62.5)                            | 1.27, 0.88 to 1.84  | .204             |
| Approximately Level 1, 2, or 3                                            | 890                | 396 (44.5)                                               | 494 (55.5)                            | 1.24, 0.91 to 1.70  | .169             |
| vs. No formal qualifications or don't know                                | 292                | 163 (55.8)                                               | 129 (44.2)                            |                     |                  |
| <b>Social class grade</b>                                                 |                    |                                                          |                                       |                     | Overall: .574    |
| Grade A or B                                                              | 386                | 137 (35.5)                                               | 249 (64.5)                            | 1.09, 0.78 to 1.51  | .617             |
| Grade C1 or C2                                                            | 931                | 420 (45.1)                                               | 511 (54.9)                            | 0.94, 0.74 to 1.19  | .604             |
| vs. Grade D or E                                                          | 571                | 280 (49.0)                                               | 291 (51.0)                            |                     |                  |
| <b>Personal diagnosis of cancer</b>                                       |                    |                                                          |                                       |                     |                  |
| Yes vs. No                                                                | 98<br>1,790        | 37 (37.8)<br>800 (44.7)                                  | 61 (62.2)<br>990 (55.3)               | 1.08, 0.68 to 1.74  | .741             |
| <b>Knows someone with cancer</b>                                          |                    |                                                          |                                       |                     |                  |
| Yes vs. No or don't know                                                  | 1,113<br>775       | 427 (38.4)<br>410 (52.9)                                 | 686 (61.6)<br>365 (47.1)              | 1.35, 1.09 to 1.68  | <b>.005</b>      |
| <b>Previously read a screening leaflet</b>                                |                    |                                                          |                                       |                     |                  |
| Yes vs. No or not sure                                                    | 1,058<br>830       | 416 (39.3)<br>421 (50.7)                                 | 642 (60.7)<br>409 (49.3)              | 1.18, 0.91 to 1.52  | .206             |
| <b>Previously read an NHS screening website</b>                           |                    |                                                          |                                       |                     |                  |
| Yes vs. No or not sure                                                    | 324<br>1,564       | 109 (33.6)<br>728 (46.5)                                 | 215 (66.4)<br>836 (53.5)              | 1.01, 0.75 to 1.37  | .955             |
| <b>Discussed screening with doctor/nurse</b>                              |                    |                                                          |                                       |                     |                  |
| Yes vs. No                                                                | 624<br>1,264       | 217 (34.8)<br>620 (49.1)                                 | 407 (65.2)<br>644 (50.9)              | 1.25, 0.97 to 1.61  | .091             |
| <b>Previously read or heard similar information</b>                       |                    |                                                          |                                       |                     |                  |
| Yes vs. No or not sure                                                    | 662<br>1,226       | 224 (33.8)<br>613 (50.0)                                 | 438 (66.2)<br>613 (50.0)              | 1.18, 0.93 to 1.50  | .185             |
| <b>Previously encountered any term(s)</b>                                 |                    |                                                          |                                       |                     |                  |
| Yes vs. No                                                                | 1,051<br>837       | 168 (21.2)<br>669 (61.1)                                 | 625 (78.8)<br>426 (38.9)              | 4.88, 3.89 to 6.11  | <b>&lt;.0005</b> |
| <b>Perceived clarity of information</b>                                   |                    |                                                          |                                       |                     | Overall: .148    |
| Extremely clear                                                           | 170                | 67 (39.4)                                                | 103 (60.6)                            | 1.36, 0.85 to 2.17  | .204             |
| Very clear                                                                | 636                | 255 (40.1)                                               | 381 (59.9)                            | 1.38, 0.96 to 1.98  | .083             |
| Moderately clear                                                          | 685                | 308 (45.0)                                               | 377 (55.0)                            | 1.39, 0.97 to 1.98  | .073             |
| Slightly clear                                                            | 206                | 109 (52.9)                                               | 97 (47.1)                             | 0.99, 0.64 to 1.53  | .953             |
| vs. Not at all clear                                                      | 191                | 98 (51.3)                                                | 93 (48.7)                             |                     |                  |
|                                                                           |                    | <b>Mean (SD)</b>                                         |                                       |                     |                  |
| <b>Age (in years)</b>                                                     | 1,888              | 43.4 (15.6)                                              | 43.7 (15.8)                           | 1.00, 0.99 to 1.00  | .262             |

N.B. Adjusted ORs and 95% CIs are relative to a stated reference category except age, which is per unit increase; p-values <.05 are in bold; all predictor variables are included in the model

## DISCUSSION

This study aimed to address a gap in the literature regarding how best to communicate the concept of overdiagnosis (8). We investigated whether people are familiar with terms used to describe overdiagnosis or related concepts, and whether these made sense as labels for widely used descriptions. We found that a majority of participants (58.0%) had never encountered any of the assessed terms before and a large proportion (44.3%) did not rate any term as making sense as a suitable label for either of two widely used descriptions of the concept. In addition, no specific term(s) emerged as being notably more familiar or applicable.

A previous similar study found that only 30.0% of the UK general public (aged 50-70) had previously encountered the specific term, 'overdiagnosis' (9), which is broadly comparable to the 21.8% who reported having encountered it in this study. Our findings are also consistent with those of a previous study that was part of redesign of the information materials for the NHS Breast Screening Programme (20). Women were interviewed with the aim of finding ways to communicate the concept of overdiagnosis: participants generally struggled to understand it, regardless of whether it was labelled as 'overdiagnosis' or 'overtreatment'.

Terminology can have a role in transferring information to lay individuals as part of a description of technical concepts (11,21). However, the main implication of our results is that currently there may only be limited value in using any of the labels that we tested. Terms used were neither familiar nor rated as particularly relevant in this large, diverse sample, meaning that they may be confusing, unintuitive, and hard for people to memorise and recall. Even the most technically appropriate terms (e.g. 'overdiagnosis' and 'overdetection') were not endorsed as making sense more frequently than suggested alternative terminology (e.g. 'unnecessary diagnosis) or more inaccurate and potentially problematic terminology (e.g. 'false positive diagnosis'). To some

1  
2  
3  
4  
5  
6  
7  
8 extent, the limited familiarity and low levels of endorsement at present supports UK policy  
9 decisions not to use a specific term in the revised breast screening information leaflet (20).  
10 Furthermore, shortly before the start of recruitment, an updated NHS information leaflet  
11 regarding PSA screening was published, with additional detail on overdiagnosis and  
12 overtreatment (22); this also omitted any specific descriptive label.  
13  
14  
15  
16  
17

18 One unexpected finding was that the second most common number of terms that were familiar  
19 or endorsed was all seven (12.3% and 15.7%, respectively). This may be due to differences  
20 between terms being subtle: members of the public may not recall exactly which terms they had  
21 encountered but felt that broader concepts like diagnosis and treatment were familiar.  
22  
23  
24  
25

26 We found that participants with a lower level of education, who were not White British, were  
27 older, or (possibly) were from a lower social class grade were less likely to have previously  
28 encountered any term(s), suggesting that these groups may be particularly poorly served by the  
29 use of any specific terminology. Unsurprisingly, those who had previous exposure to cancer (i.e.  
30 by knowing someone with a diagnosis) and those who had encountered potentially relevant  
31 information (e.g. those who had previously discussed screening with a doctor or nurse) were  
32 more likely to have encountered any term(s). In some respects, this latter finding was surprising  
33 because although medical staff might be expected to discuss overdiagnosis with patients, there  
34 is evidence that the topic is explained only rarely (23). Those who knew someone with cancer  
35 were also more likely to endorse at least one term as making sense. It is unclear why males  
36 were more likely to endorse term(s) as making sense. This may warrant further research  
37 (possible explanations may include a degree of over-confidence in men or under-confidence in  
38 women), although this should be considered in the context of small absolute differences  
39 observed here (56.8% vs. 54.7% endorsing at least one term).  
40  
41  
42  
43  
44  
45  
46  
47  
48  
49  
50  
51  
52  
53  
54  
55  
56  
57  
58  
59  
60

1  
2  
3  
4  
5  
6  
7  
8 Continuing communication efforts mean that these results may change over time: it is plausible  
9 that ongoing campaigns (3-5) will result in the public becoming increasingly familiar with the  
10 concept and terminology, having a better understanding of the differences between similar  
11 terms (e.g. seeing 'false positives' as distinct from 'overdiagnosis'), and being more likely to  
12 endorse particular terms as applicable. However, present attempts to communicate  
13 overdiagnosis (e.g. as part of screening invitations or mainstream media stories) may be more  
14 effective if explicit descriptions are used, such as adapted forms of information from the Breast  
15 Screening Programme. This has undergone an extensive design process (20) and is more likely  
16 to be rated as clearer than the equivalent from the Prostate Cancer Risk Management  
17 Programme. However, fewer than half of participants (46.6%) rated it as very or extremely clear,  
18 suggesting that future research could be used to improve it further (e.g. by providing additional  
19 detail; 15).

20  
21 This study has limitations. The data collection method used by the survey company meant that  
22 demographic characteristics used to ensure population-representativeness were not exhaustive  
23 (e.g. they omitted ethnicity and education) and response rates were not available. The list of  
24 terms tested was also not exhaustive; there may be suitable terminology that we did not assess.  
25 However, we found very similar levels of endorsement for terms that used several variations on  
26 the themes of diagnosis, treatment, and false positives, providing some evidence that any  
27 superior terms would have to be quite different. In addition, as noted in our previous study,  
28 descriptions of overdiagnosis were brief and presented outside the context of the original written  
29 information about screening from which they were adapted; comprehension may be different  
30 (either better or worse) in the presence of additional detail (15); this warrants further research.

## 31 32 33 34 35 36 37 38 39 40 41 42 43 44 45 46 47 48 49 **Conclusions**

1  
2  
3  
4  
5  
6  
7  
8 Alternative terminology to 'overdiagnosis' may help increase awareness and understanding of  
9 the concept among individuals who may face healthcare decisions that would put them at risk.  
10 These results suggest that, at present, using specific terms would have limited benefits and may  
11 be less well suited to particular groups (e.g. less educated or non-White British individuals). It  
12 may currently be more effective to refer to the concept via more explicit descriptions. Previous  
13 research indicates that information from the NHS Breast Screening Programme may be a  
14 relatively effective template for this purpose. However, future research could explore scope for  
15 improvement.  
16  
17  
18  
19  
20  
21  
22

23 **Contributors:** AG, CR, and JW conceived and designed the study. AG analysed the data. AG,  
24 CR, and JW participated in the interpretation of results. AG, CR, and JW drafted the manuscript,  
25 participated in critical revision, and approved the final version.  
26  
27  
28

29 **Funding:** This work was supported by a programme grant from Cancer Research UK awarded  
30 to Prof Jane Wardle [C1418/A14134]. Dr Jo Waller is supported by a Career Development  
31 Fellowship from Cancer Research UK [C7492/A17219]. Cancer Research UK was not involved  
32 in the design of this study; the collection, analysis, or interpretation of the results; in the writing  
33 of the manuscript; or in the decision to submit for publication.  
34  
35  
36  
37  
38

39 **Competing interests:** None declared.  
40

41 **Patient consent:** Obtained.  
42  
43

44 **Data sharing:** No additional data are available.  
45  
46

## 47 REFERENCES

48

- 49 1. Heath I. Overdiagnosis: when good intentions meet vested interests — an essay by Iona  
50  
51  
52  
53  
54  
55  
56  
57  
58  
59  
60

- 1  
2  
3  
4  
5  
6  
7  
8 Heath. Br Med J. 2013;347:f6361.  
9  
10  
11 2. Moynihan R, Doust J, Henry D. Preventing overdiagnosis: how to stop harming he  
12 healthy. Br Med J. 2012;344:e3502.  
13  
14  
15 3. Glasziou P, Moynihan R, Richards T, Godlee F. Too much medicine; too little care. Br  
16 Med J. 2013;347:f4247.  
17  
18  
19 4. Malhotra A, Maughan D, Ansell J, et al. Choosing Wisely in the UK: the Academy of  
20 Medical Royal Colleges' initiative to reduce the harms of too much medicine. Br Med J.  
21 2015;350:h2308.  
22  
23  
24  
25 5. Calderwood C. Chief Medical Officer's annual report 2014-15. 2016.  
26 <http://www.gov.scot/Publications/2016/01/3745/0>  
27  
28  
29  
30 6. Hersch J, Jansen J, Barratt A, et al. Women's views on overdiagnosis in breast cancer  
31 screening: a qualitative study. Br Med J. 2013;346:f158.  
32  
33  
34 7. Waller J, Douglas E, Whitaker KL, Wardle J. Women's responses to information about  
35 overdiagnosis in the UK breast cancer screening programme: a qualitative study. BMJ  
36 Open. 2013;3:e002703.  
37  
38  
39  
40 8. McCaffery KJ, Jansen J, Scherer LD, et al. Walking the tightrope: communicating  
41 overdiagnosis in modern healthcare. Br Med J. 2016;352:i348.  
42  
43  
44  
45 9. Ghanouni A, Meisel SF, Renzi C, Wardle J, Waller J. Public definitions of the term  
46 'overdiagnosis' in the UK. BMJ Open. 2016:e010723.  
47  
48  
49 10. Moynihan R, Nickel B, Hersch J, et al. What do you think overdiagnosis means? A  
50  
51  
52  
53  
54  
55  
56  
57  
58  
59  
60

- 1  
2  
3  
4  
5  
6  
7  
8 qualitative analysis of responses from a national community survey of Australians. BMJ  
9 Open. 2015;5:e007436.
- 10  
11  
12 11. Hersch J, Jansen J, Barratt A, et al. Overdetection in breast cancer screening:  
13 development and preliminary evaluation of a decision aid. BMJ Open. 2014;4:e006016.  
14  
15  
16 12. Moynihan R, Nickel B, Hersch J, et al. Public opinions about overdiagnosis: a national  
17 community survey. PLoS One. 2015;10:e0125165.  
18  
19  
20  
21 13. NHS Breast Screening Programme. NHS Breast Screening: Helping you decide. 2013.  
22 Available from:  
23  
24 [https://www.gov.uk/government/uploads/system/uploads/attachment\\_data/file/440798/nh](https://www.gov.uk/government/uploads/system/uploads/attachment_data/file/440798/nhsbsp.pdf)  
25 [sbsp.pdf](https://www.gov.uk/government/uploads/system/uploads/attachment_data/file/440798/nhsbsp.pdf)  
26  
27  
28  
29 14. Burford D, Austoker J, Kirby M. PSA (prostate specific antigen) testing for prostate  
30 cancer. An information sheet for men considering a PSA test. 2009.  
31  
32  
33 15. Ghanouni A, Renzi C, McBride E, Waller J. Comparing perceived clarity of information  
34 on overdiagnosis used for breast and prostate cancer screening in England: an  
35 experimental survey. BMJ Open. 2017;7:e015955.  
36  
37  
38  
39 16. National Readership Survey. Social grade. [http://www.nrs.co.uk/nrs-print/lifestyle-and-](http://www.nrs.co.uk/nrs-print/lifestyle-and-classification-data/social-grade/)  
40 [classification-data/social-grade/](http://www.nrs.co.uk/nrs-print/lifestyle-and-classification-data/social-grade/) Accessed: 1<sup>st</sup> December 2017.  
41  
42  
43  
44 17. Weinstein ND. The precaution adoption process. Heal Psychol. 1988;7:355–86.  
45  
46  
47 18. Willis GB , Artino AR . What do our respondents think we're asking? using cognitive  
48 interviewing to Improve Medical Education surveys. J Grad Med Educ 2013;5:353–6.  
49  
50  
51  
52  
53  
54  
55  
56  
57  
58  
59  
60

- 1  
2  
3  
4  
5  
6  
7  
8 19. Office of National Statistics. 2011 Census: Key Statistics for England and Wales, March  
9 2011. 2012 [http://www.ons.gov.uk/ons/rel/census/2011-census/key-statistics-for-local-](http://www.ons.gov.uk/ons/rel/census/2011-census/key-statistics-for-local-authorities-in-england-and-wales/stb-2011-census-key-statistics-for-england-and-wales.html)  
10 [authorities-in-england-and-wales/stb-2011-census-key-statistics-for-england-and-](http://www.ons.gov.uk/ons/rel/census/2011-census/key-statistics-for-local-authorities-in-england-and-wales/stb-2011-census-key-statistics-for-england-and-wales.html)  
11 [wales.html](http://www.ons.gov.uk/ons/rel/census/2011-census/key-statistics-for-local-authorities-in-england-and-wales/stb-2011-census-key-statistics-for-england-and-wales.html) (accessed 28 Nov 2016).  
12  
13  
14  
15
- 16 20. Forbes LJ, Ramirez AJ, Expert group on Information about Breast Screening. Offering  
17 informed choice about breast screening. *J Med Screen*. 2014;21:194–200.  
18  
19
- 20 21. Fage-Butler AM, Nisbeth Jensen M. Medical terminology in online patient-patient  
21 communication: evidence of high health literacy? *Heal Expect*. 2016;19:643–53.  
22  
23  
24
- 25 22. Public Health England. PSA testing and prostate cancer: advice for well men aged 50  
26 and over. 2016. Available from:  
27 [https://www.gov.uk/government/uploads/system/uploads/attachment\\_data/file/509191/P-](https://www.gov.uk/government/uploads/system/uploads/attachment_data/file/509191/Patient_info_sheet.pdf)  
28 [atient\\_info\\_sheet.pdf](https://www.gov.uk/government/uploads/system/uploads/attachment_data/file/509191/Patient_info_sheet.pdf)  
29  
30  
31  
32
- 33 23. Wegwarth O, Gigerenzer G. Less is more: overdiagnosis and overtreatment: evaluation  
34 of what physicians tell their patients about screening harms. *JAMA Intern Med*.  
35 2013;173:2086-7.  
36  
37  
38  
39  
40  
41  
42  
43  
44  
45  
46  
47  
48  
49  
50  
51  
52  
53  
54  
55  
56  
57  
58  
59  
60

# BMJ Open

## Improving public understanding of 'overdiagnosis' in England: a population survey assessing familiarity with possible terms for labelling the concept and perceptions of appropriate terminology

|                                 |                                                                                                                                                                                                                                                           |
|---------------------------------|-----------------------------------------------------------------------------------------------------------------------------------------------------------------------------------------------------------------------------------------------------------|
| Journal:                        | <i>BMJ Open</i>                                                                                                                                                                                                                                           |
| Manuscript ID                   | bmjopen-2017-021260.R2                                                                                                                                                                                                                                    |
| Article Type:                   | Research                                                                                                                                                                                                                                                  |
| Date Submitted by the Author:   | 17-Apr-2018                                                                                                                                                                                                                                               |
| Complete List of Authors:       | Ghanouni, Alex; University College London, Research Department of Behavioural Science and Health<br>Renzi, Cristina; UCL, Research Department of Behavioural Science and Health<br>Waller, Jo; UCL, Research Department of Behavioural Science and Health |
| <b>Primary Subject Heading</b>: | Communication                                                                                                                                                                                                                                             |
| Secondary Subject Heading:      | Epidemiology, Public health, Health services research                                                                                                                                                                                                     |
| Keywords:                       | EPIDEMIOLOGY, PUBLIC HEALTH, Health policy < HEALTH SERVICES ADMINISTRATION & MANAGEMENT                                                                                                                                                                  |
|                                 |                                                                                                                                                                                                                                                           |

SCHOLARONE™  
Manuscripts

Only

**FULL TITLE PAGE**

**Title:** Improving public understanding of 'overdiagnosis' in England: a population survey assessing familiarity with possible terms for labelling the concept and perceptions of appropriate terminology

**Manuscript type:** Research article

Authors:

Alex Ghanouni<sup>a</sup> a.ghanouni@ucl.ac.uk

Cristina Renzi<sup>a</sup> c.renzi@ucl.ac.uk

Jo Waller<sup>ab</sup> j.waller@ucl.ac.uk | Tel: +44 (0)20 7679 5958 | Fax: +44 (0)20 7679 8354

Affiliations:

<sup>a</sup>Research Department of Behavioural Science and Health, University College London, Gower Street, London, WC1E 6BT, United Kingdom

<sup>b</sup>Corresponding author

**Word count:** Abstract: 299/300; Body: 3,493/4,000; References: 24; Tables or figures: 5

**ABSTRACT**

*Objectives:* Communicating the concept of 'overdiagnosis' to lay individuals is challenging, partly because the term itself is confusing. This study tested whether alternative descriptive labels may be more appropriate.

*Design:* Questionnaire preceded by a description of overdiagnosis.

*Setting:* Home-based, computer-assisted face-to-face survey.

*Participants:* 2,111 adults aged 18 to 70 years in England recruited using random location sampling by a survey company. Data from 1,888 participants were analysed after exclusions due to missing data.

*Interventions:* Participants were given one of two pieces of text describing overdiagnosis, allocated at random, adapted from NHS breast and prostate cancer screening leaflets.

*Primary and secondary outcome measures:* Main outcomes were which of several available terms (e.g. 'overdetection') participants had previously encountered and which they endorsed as applicable labels for the concept described. Demographics and previous exposure to screening information were also measured. Main outcomes were summarised with descriptive statistics. Predictors of previously encountering at least one term, or endorsing at least one as making sense, were assessed using binary logistic regression.

*Results:* 58.0% of participants had not encountered any suggested term; 44.0% did not endorse any as applicable labels. No term was notably familiar; the proportion of participants who had previously encountered each term ranged from 15.9 to 28.3%. Each term was only endorsed as applicable by a minority (range: 27.6% to 40.4%). Notable predictors of familiarity included

1  
2  
3  
4  
5  
6  
7  
8 education, age, and ethnicity; participants were less likely to have encountered terms if they  
9 were older, not White British or had less education, Findings were similar for both pieces of  
10 information.  
11  
12

13  
14 *Conclusions:* Familiarity with suggested terms for overdiagnosis and levels of endorsement  
15 were low and no clear alternative labels for the concept were identified, suggesting that  
16 changing terminology alone would do little to improve understanding, particularly for some  
17 population groups. Explicit descriptions may be more effective.  
18  
19  
20

21  
22 **Keywords:** Decision Making; Surveys and Questionnaires; Early Detection of Cancer; Mass  
23 Screening; Medical Overuse  
24  
25  
26

#### 27 **Strengths and limitations of this study**

- 28 • This study assessed (predictors of) familiarity and perceived appropriateness of a  
29 broad range of possible terms for the concept of 'overdiagnosis' among a large,  
30 representative sample of the general public in England.  
31  
32
- 33 • The concept was described based on information that was widely used by the  
34 National Health Service in England, maintaining generalisability.  
35  
36
- 37 • The demographic criteria used to achieve population-representativeness were not  
38 comprehensive and response rates were not available.  
39  
40
- 41 • The list of possible terms was also not exhaustive; more suitable alternative labels  
42 may have been omitted.  
43  
44
- 45 • Results may be time-dependent: ongoing communication initiatives may change  
46 perceptions of appropriate terms for the concept of 'overdiagnosis'.  
47  
48  
49  
50  
51  
52  
53  
54  
55  
56  
57  
58  
59  
60

## INTRODUCTION

There is growing concern among healthcare providers and policymakers about the potential for medical tests to detect asymptomatic disease that would never have become clinically apparent or resulted in death (1). 'Overdiagnosis' can harm, primarily via the subsequent risks and costs associated with unnecessary treatment but also via opportunity costs to a healthcare service due to overuse of scarce resources (2). Various initiatives have aimed to propagate understanding of the concept among patients and the public so that they can make better informed decisions about their health (e.g. 3–5). However, previous studies have found that the concept is challenging to communicate to lay people (e.g. in the context of breast cancer screening; 6,7).

Little is known about how to improve communication of overdiagnosis (8). One barrier is that the term 'overdiagnosis' itself may be confusing and counterintuitive. For example, a previous study in the UK asked members of the public to give their interpretation of what the word meant; a large proportion of participants gave definitions that did not match the concept but resembled other similar words (e.g. 'providing an incorrect diagnosis' since 'overdiagnosis' resembles 'misdiagnosis'; 9). Equivalent findings have been reported by a previous survey in Australia (10). In addition, a focus group study undertaken as part of the development of a decision aid for breast screening found that 'overdiagnosis' was not understood intuitively and that 'overdetection' may be clearer (11).

These findings suggest that the term 'overdiagnosis' does not clearly reflect its intended meaning for the general public and that other terms (such as 'overdetection') may be more appropriate. Hence, this study asked a large sample of the public in England to appraise descriptions of the concept and tested which of several possible terms people thought made

1  
2  
3  
4  
5  
6  
7  
8 sense as labels (i.e. endorsement). Alternatives included 'overdetection' or 'unnecessary  
9 diagnosis' (11) as well as terms related to unnecessary therapy (e.g. 'overtreatment') and terms  
10 that were less technically accurate but still had the potential to be seen as applicable (e.g. 'false  
11 positives'; 9, 10). A limitation to the utility of 'overdiagnosis' as a label may be the currently low  
12 level of public awareness of the term (9, 12). Consequently, this study also measured which  
13 terms people had encountered before (i.e. familiarity) to test whether any alternatives were  
14 notably more familiar. We also explored whether participant characteristics were associated with  
15 having previously encountered these terms, or with endorsing them as making sense, as this  
16 may aid targeted communication efforts.  
17  
18  
19  
20  
21  
22  
23

24  
25 Information was derived from materials that have been widely used by the NHS Breast  
26 Screening Programme (13) and the Prostate Cancer Risk Management Programme (14). The  
27 study was carried out as part of Wave 3 of the Attitudes, Behaviour and Cancer UK Survey  
28 (ABACUS). Other studies arising from this survey have also been published (e.g. 15).  
29  
30  
31  
32

## 33 **METHODS**

### 34 **Design**

35  
36 Institutional approval was granted by the University College London Research Ethics  
37 Committee (5771/002). The focus of the present study was on appropriate terminology for  
38 widely used descriptions of overdiagnosis. However, the ABACUS survey was a broader piece  
39 of work that also compared the perceived clarity of different forms of overdiagnosis information.  
40 Hence, elements of the design and measures have also been reported elsewhere (15). Face-to-  
41 face computer-assisted interviews were conducted by TNS (a market research company) as  
42 part of a weekly omnibus survey and took place in participants' homes between April and May  
43  
44  
45  
46  
47  
48  
49  
50  
51  
52  
53  
54  
55  
56  
57  
58  
59  
60

1  
2  
3  
4  
5  
6  
7  
8 *"We would now like to ask you some questions about leaflets on health-related topics. The NHS*  
9 *offers people a variety of screening tests to check for illnesses before symptoms have*  
10 *appeared. People offered an NHS screening test are often given a leaflet that explains the risks*  
11 *and benefits of having the test. The leaflet is either posted or given out by a doctor or nurse."*  
12  
13  
14  
15

16 Participants then received information on overdiagnosis adapted from written material used by  
17 the NHS in England as part of either i) the Breast Screening Programme or ii) the Prostate  
18 Cancer Risk Management Programme as they existed in February 2016 (neither of which used  
19 a specific label), allocated at random in a 1:1 ratio:  
20  
21  
22  
23

24 *"The test can find an illness that would never have caused a person harm. Some people will be*  
25 *diagnosed and treated for an illness that would never otherwise have been found and would not*  
26 *have become life-threatening."* From the breast screening information leaflet (13)  
27  
28  
29

30 *"The test may make you worry by finding an illness that may never cause any symptoms or*  
31 *shorten your life."* From the prostate screening information leaflet (14)  
32  
33  
34

35 The Breast Screening Programme in England offers triennial mammography to all women  
36 between the ages of 50 to 70 years and registered with a General Practitioner. The Prostate  
37 Screening Risk Management Programme allows men aged 50 years or older to have a Prostate  
38 Specific Antigen test by requesting it from their GP after discussing the risks and benefits.  
39  
40 References to cancer were removed so that findings could be generalised to beyond these two  
41 specific screening contexts.  
42  
43  
44  
45

## 46 **Participants**

47

48 Participants were members of the public in England aged 18 to 70 years. National  
49 representativeness was sought via a two-stage process. In the first instance, random location  
50  
51  
52  
53  
54  
55  
56  
57  
58  
59  
60

1  
2  
3  
4  
5  
6  
7  
8 sampling was carried out using the Postcode Address File and Census statistics. Within each  
9  
10 selected location, participant quotas were set based on demographic characteristics (i.e. age,  
11  
12 gender, employment status, and presence of children in the home).

### 13 14 **Measures**

15  
16  
17 Demographics: Relevant measures consisted of age, gender, ethnicity, social grade (16),  
18  
19 marital status, highest level of education obtained, personal history of cancer (*"Have you ever*  
20  
21 *been diagnosed with cancer?"*; "yes" or "no"), and whether anyone they know had been  
22  
23 diagnosed with cancer (*"Has anyone close to you ever been diagnosed with cancer?"*; "yes",  
24  
25 "no", or "don't know").

26  
27 Familiarity with screening information: Participants were asked whether they had ever  
28  
29 previously received information about screening (for cancer or other illnesses) via i) reading a  
30  
31 leaflet from the NHS, ii) reading an NHS website, and iii) talking with a doctor or nurse  
32  
33 (response options: "yes", "no", "not sure").

34  
35 If participants were eligible for cancer screening and had not been diagnosed with the target  
36  
37 disease, they were asked about their previous participation (e.g. only women aged 47-70 years  
38  
39 without a breast cancer diagnosis were asked about breast screening participation) via items  
40  
41 designed using the Precaution Adoption Process Model (PAPM; 17), a stage theory of  
42  
43 protective health behaviour. This measures whether participants have heard of a particular type  
44  
45 of screening, whether they have heard of a type of screening but have never been invited,  
46  
47 whether they have been invited but never participated, whether they have participated but not  
48  
49 consistently, and whether they have participated consistently. Eligibility criteria and exact  
50  
51 question wording for assessing experience have been reported elsewhere (15).  
52  
53  
54  
55  
56  
57  
58  
59  
60

1  
2  
3  
4  
5  
6  
7  
8 Perceived clarity of information: After reading the information allocated at random, participants  
9  
10 were asked, "How clear do you find this description of a risk of the test?" with available  
11 responses of "extremely clear", "very clear", "moderately clear", "slightly clear", and "not at all  
12 clear". This was followed by a question on whether they had read or heard similar information  
13 about a screening test before (possible responses were: "yes", "no", and "not sure").  
14  
15

16  
17  
18 Main outcomes: The first main outcome measure (endorsement) consisted of "Does this term  
19 make sense to you as a way of describing this risk of a screening test?", followed by seven  
20 terms: "overdiagnosis", "overdetection", "unnecessary diagnosis", "overtreatment", "unnecessary  
21 treatment", "false positive diagnosis", and "false positive test results"<sup>1</sup> (responses: "yes", "no").  
22  
23

24 Suggested terms were based on previous literature (e.g. 11) and discussion among the  
25 research team.  
26  
27

28  
29 The second outcome measure (familiarity) was: "Have you ever seen or heard any of the  
30 previous seven terms before today?" and if participants responded "yes", they were asked  
31 which out of the previous terms (responses: "yes", "no", "not sure").  
32  
33

34  
35 Ancillary measures: The measures used in this study were part of the broader ABACUS survey.  
36 Most of the items in this study were presented at the start of the survey and so the effects of  
37 priming from unrelated items were expected to be minimal. In order, the full survey included:  
38 questions on decision-making style and previous exposure to cancer screening information,  
39  
40  
41  
42  
43

---

44  
45  
46 <sup>1</sup> Participants were also asked, "Can you think of any other terms to describe this risk that would  
47 make sense to you?". However, only approximately 60 responses suggesting potentially  
48 applicable terms were recorded across all participants (e.g. "oversensitivity", "unknown  
49 diagnosis"), of which most were mentioned just once and so no further analysis was attempted.  
50  
51  
52  
53  
54  
55  
56  
57  
58  
59

1  
2  
3  
4  
5  
6  
7  
8 information on overdiagnosis adapted from screening leaflets, questions on perceived clarity of  
9 this information, previous exposure to similar information, the main study outcomes, and help-  
10 seeking behaviour in relation to cancer screening, followed by more questions on self-rated  
11 health, questions on cancer diagnoses, perceived cancer risk, screening behaviour in relation to  
12 each of the applicable programmes (cervical, breast, bowel, prostate), and educational level.  
13  
14  
15  
16

### 17 **Public Involvement**

18  
19  
20 Public involvement consisted of input into the design of the study and development of measures  
21 via pilot testing of the survey. This comprised two stages: first, a series of telephone cognitive  
22 interviews (18) was used to determine whether items could be understood by lay people (n=11)  
23 and that the survey was not overly burdensome. Participants were asked for feedback on any  
24 items they found difficult to understand or answer and the survey was revised accordingly.  
25  
26 Second, a web-based version of the survey was pilot-tested with 431 participants. There are  
27 currently no plans to disseminate the results to study participants.  
28  
29  
30  
31  
32

### 33 **Analysis**

34  
35  
36 Participants were excluded if they declined to answer any of the measures included in this  
37 study. Ethnicity and marital status were dichotomised into "White British" and "other ethnic  
38 groups", and "single, widowed, divorced or separated" and "married or living as a couple",  
39 respectively. Social class grade was categorised as "grades A or B", "grades C1 or C2", and  
40 "grades D or E". Education was coded based on Levels 1-4 from the Office of National Statistics  
41 (19) or "Other" for non-ordinal levels of education such as professional qualifications.  
42  
43  
44  
45  
46

47  
48 Sample characteristics were summarised with descriptive statistics. We report the percentages  
49 of participants (with binomial 95% confidence intervals) who had i) previously encountered and  
50  
51  
52  
53  
54  
55  
56  
57  
58  
59  
60

1  
2  
3  
4  
5  
6  
7  
8 ii) endorsed each possible number of terms (from 0 to 7 in both cases), and the percentages of  
9 participants who had previously encountered and endorsed each specific term.

10  
11 Responses to i) and ii) were also recoded into “previously seen or heard one or more terms”  
12 (familiarity) and “endorsed one or more terms as making sense to them” (endorsement) for  
13 further evaluation e.g. “was familiar with at least one term” vs. “was not familiar” (including  
14 responses of “not sure”). Two exploratory logistic regression models tested the null hypothesis  
15 that predictor variables were unrelated to either of these outcomes. In both models, predictor  
16 variables consisted of demographic characteristics, familiarity with screening information, the  
17 overdiagnosis information condition (breast vs. prostate), and perceived clarity. In addition, each  
18 model included the outcome from the other as a predictor (e.g. the endorsement model included  
19 familiarity as a potential predictor variable). Variance Inflation Factors were small (all <2.969  
20 and <2.972, respectively), indicating that (multi)collinearity was limited and a Box-Tidwell  
21 procedure found little evidence to suggest that the age variable violated the assumption of  
22 linearity (p-values: .110 and .508). Adjusted odds-ratios (ORs), accompanying 95% CIs, and p-  
23 values for having previously seen or heard one or more terms before and endorsing one or  
24 more term as making sense are reported alongside descriptive statistics.  
25  
26  
27  
28  
29  
30  
31  
32  
33  
34  
35  
36  
37

## 38 **RESULTS**

### 39 **Participant characteristics**

40  
41 After excluding 223 participants with missing data, 1,888 cases were analysed. Sample  
42 characteristics are presented in Table 1. Mean age was 43.6 years (standard deviation: 15.7).  
43  
44  
45  
46  
47

### 48 **Familiarity with terms**

1  
2  
3  
4  
5  
6  
7  
8 Table 2 illustrates that the majority of participants (58.0%) were not familiar with any of the listed  
9 terms. However, the second most common number of terms recognised as familiar was all  
10 seven (12.3%). The percentages of participants previously encountering between one and six  
11 terms ranged from 1.1% to 9.4%. Table 2 also shows that the percentages of participants who  
12 had encountered each specific term ranged from 15.9% (*“overdetection”*) to 28.3% (*“false*  
13 *positive test results”*).  
14  
15  
16  
17  
18

19 Table 3 reports predictors of familiarity with at least one term. Among demographic  
20 characteristics, there was strong evidence against the null hypothesis for ethnicity, education,  
21 and age: White British participants were more likely to be familiar with at least one term  
22 compared with other ethnic groups. Participants with a higher (or ‘other’) level of education were  
23 also more likely to be familiar with one or more terms compared with participants who had no  
24 formal qualifications (or did not know). Older participants were less likely to be familiar with one  
25 or more terms. Participants were also more likely to be familiar with one or more terms if they  
26 knew someone with cancer, had previously read an NHS website about screening, discussed  
27 screening with a doctor or nurse, had previously read or seen similar information, or endorsed  
28 one or more terms as making sense as labels.  
29  
30  
31  
32  
33  
34  
35  
36  
37

38 Finally, there was moderate evidence against the null hypothesis for an association with social  
39 class grade with participants in grades A or B being more likely to be familiar with at least one  
40 term compared with participants in grades D or E.  
41  
42  
43

#### 44 **Terms endorsed as making sense**

45  
46 Table 4 shows that participants most commonly did not endorse any terms as making sense  
47 (44.3%). As with results for familiarity, the second most common number of terms endorsed was  
48 all seven (15.7%). The most commonly endorsed term was *“unnecessary treatment”* (40.4% of  
49  
50  
51  
52  
53  
54  
55  
56  
57  
58  
59  
60

1  
2  
3  
4  
5  
6  
7  
8 participants in the sample endorsed this term overall; 41.4% and 39.3% after being given the  
9 breast and prostate information, respectively). Endorsement of other terms ranged from 27.9%  
10 (“*overdetection*”) to 35.4% (“*unnecessary diagnosis*”) for information from breast screening and  
11  
12 (“*overdetection*”) to 36.6% (“*false positive test results*”) for information from prostate  
13  
14 screening.  
15  
16

17  
18 Other than familiarity (Table 3), the logistic regression analysis of predictors of endorsement  
19 only showed strong evidence against the null hypothesis for gender and knowing someone with  
20 cancer: males and participants who knew someone diagnosed with cancer were more likely to  
21 endorse at least one term as making sense (Table 5).  
22  
23  
24  
25  
26  
27  
28  
29  
30  
31  
32  
33  
34  
35  
36  
37  
38  
39  
40  
41  
42  
43  
44  
45  
46  
47  
48  
49  
50  
51  
52  
53  
54  
55  
56  
57  
58  
59  
60

Table 1 – Characteristics of the sample

| Total N=1,888                                       |       |        |
|-----------------------------------------------------|-------|--------|
| Characteristic                                      | n     | (%)    |
| <b>Overdiagnosis information</b>                    |       |        |
| Breast screening text                               | 987   | (52.3) |
| Prostate screening text                             | 901   | (47.7) |
| <b>Gender</b>                                       |       |        |
| Male                                                | 879   | (46.6) |
| Female                                              | 1,009 | (53.4) |
| <b>Ethnicity</b>                                    |       |        |
| White British                                       | 1,432 | (75.8) |
| Other ethnic groups                                 | 456   | (24.2) |
| <b>Marital status</b>                               |       |        |
| Married or living as a couple                       | 1,133 | (60.0) |
| Single, widowed, divorced, or separated             | 755   | (40.0) |
| <b>Highest level of education<sup>1</sup></b>       |       |        |
| No formal qualifications                            | 281   | (14.9) |
| Approximately Level 1, 2, or 3                      | 890   | (47.1) |
| Approximately Level 4                               | 507   | (26.9) |
| Other                                               | 199   | (10.5) |
| Don't know/Not sure                                 | 11    | (0.6)  |
| <b>Social class grade<sup>2</sup></b>               |       |        |
| Grade A or B                                        | 386   | (20.4) |
| Grade C1 or C2                                      | 931   | (49.3) |
| Grade D or E                                        | 571   | (30.2) |
| <b>Personal diagnosis of cancer</b>                 |       |        |
| Yes                                                 | 98    | (5.2)  |
| No                                                  | 1,790 | (94.8) |
| <b>Knows someone with cancer</b>                    |       |        |
| Yes                                                 | 1,113 | (59.0) |
| No                                                  | 771   | (40.8) |
| Don't know/Not sure                                 | 4     | (0.2)  |
| <b>Any previous cervical screening experience</b>   |       |        |
| Yes                                                 | 652   | (34.5) |
| No                                                  | 226   | (12.0) |
| Not eligible                                        | 1,010 | (53.5) |
| <b>Any previous breast screening experience</b>     |       |        |
| Yes                                                 | 317   | (16.8) |
| No                                                  | 83    | (4.4)  |
| Not eligible                                        | 1,488 | (78.8) |
| <b>Any previous bowel screening experience</b>      |       |        |
| Yes                                                 | 293   | (15.5) |
| No                                                  | 181   | (9.6)  |
| Not eligible                                        | 1,414 | (74.9) |
| <b>Any previous prostate screening experience</b>   |       |        |
| Yes                                                 | 77    | (4.1)  |
| No                                                  | 344   | (18.2) |
| Not eligible                                        | 1,467 | (77.7) |
| <b>Previously read a screening leaflet</b>          |       |        |
| Yes                                                 | 1,058 | (56.0) |
| No                                                  | 809   | (42.8) |
| Don't know/Not sure                                 | 21    | (1.1)  |
| <b>Previously read an NHS screening website</b>     |       |        |
| Yes                                                 | 324   | (17.2) |
| No                                                  | 1,549 | (82.0) |
| Don't know/Not sure                                 | 15    | (0.8)  |
| <b>Discussed screening with doctor/nurse</b>        |       |        |
| Yes                                                 | 624   | (33.1) |
| No                                                  | 1,251 | (66.3) |
| Don't know/Not sure                                 | 13    | (0.7)  |
| <b>Previously read or heard similar information</b> |       |        |
| Yes                                                 | 662   | (35.1) |
| No                                                  | 1,185 | (62.8) |
| Don't know/Not sure                                 | 41    | (2.2)  |

**Perceived clarity of information**

|   |                  |     |        |
|---|------------------|-----|--------|
| 1 | Extremely clear  | 170 | (9.0)  |
| 2 | Very clear       | 636 | (33.7) |
| 3 | Moderately clear | 685 | (36.3) |
| 4 | Slightly clear   | 206 | (10.9) |
| 5 | Not at all clear | 191 | (10.1) |

<sup>1</sup>Level 1-3 qualifications include e.g. GCSEs and A Levels; Level 4 qualifications include degrees and higher degrees

<sup>2</sup>Social grades are based on occupation (e.g. Grade A includes managerial roles; Grade E includes casual workers)

For peer review only

Table 2 – Number of participants (and percentages and 95% CIs) previously encountering i) each number of possible terms and ii) each specific term. Participants receiving overdiagnosis information based on the Breast Screening programme or the Prostate Cancer Risk Management Programme were analysed separately.

|                       |        | Number of terms previously encountered: n, %, 95% CIs                                 |               |               |                       |               |                       |                          |                            |
|-----------------------|--------|---------------------------------------------------------------------------------------|---------------|---------------|-----------------------|---------------|-----------------------|--------------------------|----------------------------|
| Screening information | Total  | 0                                                                                     | 1             | 2             | 3                     | 4             | 5                     | 6                        | 7                          |
| Breast                | n (%)  | 583 (59.1)                                                                            | 73 (7.4)      | 76 (7.7)      | 53 (5.4)              | 41 (4.2)      | 28 (2.8)              | 9 (0.9)                  | 124 (12.6)                 |
| N=987                 | 95% CI | 56.0 to 62.1                                                                          | 5.9 to 9.2    | 6.2 to 9.5    | 4.1 to 6.9            | 3.0 to 5.5    | 1.9 to 4.0            | 0.5 to 1.7               | 10.6 to 14.7               |
| Prostate              | n (%)  | 512 (56.8)                                                                            | 64 (7.1)      | 101 (11.2)    | 47 (5.2)              | 37 (4.1)      | 19 (2.1)              | 12 (1.3)                 | 109 (12.1)                 |
| n=901                 | 95% CI | 53.6 to 60.0                                                                          | 5.6 to 8.9    | 9.3 to 13.4   | 3.9 to 6.8            | 3.0 to 5.6    | 1.3 to 3.2            | 0.7 to 2.2               | 10.1 to 14.3               |
| Total                 | n (%)  | 1,095 (58.0)                                                                          | 137 (7.3)     | 177 (9.4)     | 100 (5.3)             | 78 (4.1)      | 47 (2.5)              | 21 (1.1)                 | 233 (12.3)                 |
| N=1,888               | 95% CI | 55.8 to 60.2                                                                          | 6.2 to 8.5    | 8.1 to 10.8   | 4.4 to 6.4            | 3.3 to 4.1    | 1.9 to 3.3            | 0.7 to 1.7               | 10.9 to 13.9               |
|                       |        | <i>"Which of the following term or terms had you heard of before?": n, %, 95% CIs</i> |               |               |                       |               |                       |                          |                            |
| Screening information | Total  | Not sure                                                                              | Overdiagnosis | Overdetection | Unnecessary diagnosis | Overtreatment | Unnecessary treatment | False positive diagnosis | False positive test result |
| Breast                | n (%)  | 7 (0.7)                                                                               | 215 (21.8)    | 163 (16.5)    | 214 (21.7)            | 225 (22.8)    | 280 (28.4)            | 243 (24.6)               | 270 (27.4)                 |
| N=987                 | 95% CI | 0.3 to 1.4                                                                            | 19.3 to 24.4  | 14.3 to 18.9  | 19.2 to 24.3          | 20.3 to 25.5  | 25.6 to 31.2          | 22.0 to 27.4             | 24.6 to 30.2               |
| Prostate              | n (%)  | 14 (1.6)                                                                              | 196 (21.8)    | 137 (15.2)    | 216 (24.0)            | 186 (20.6)    | 253 (28.1)            | 232 (25.7)               | 265 (29.4)                 |
| n=901                 | 95% CI | 0.9 to 2.5                                                                            | 19.2 to 24.5  | 13.0 to 17.7  | 21.3 to 26.8          | 18.1 to 23.4  | 25.2 to 31.1          | 23.0 to 28.7             | 26.5 to 32.4               |
| Total                 | n (%)  | 21 (1.1)                                                                              | 411 (21.8)    | 300 (15.9)    | 430 (22.8)            | 411 (21.8)    | 533 (28.2)            | 475 (25.2)               | 535 (28.3)                 |
| N=1,888               | 95% CI | 0.7 to 1.7                                                                            | 20.0 to 23.7  | 14.3 to 17.6  | 20.9 to 24.7          | 20.0 to 23.7  | 26.2 to 30.3          | 23.2 to 27.2             | 26.3 to 30.4               |

Table 3 – Familiarity with one or more vs. no terms: descriptive statistics, adjusted ORs, 95% CIs, and p-values for variables in the multivariable binary logistic regression model

| Characteristic                                                            | Total<br>(N=1,888) | Familiarity with no terms vs. at least one term: n (%) |                                     | Adjusted OR, 95% CI | p-value                                       |
|---------------------------------------------------------------------------|--------------------|--------------------------------------------------------|-------------------------------------|---------------------|-----------------------------------------------|
|                                                                           |                    | No term<br>(n=1,095; 58.0%)                            | At least one term<br>(n=793; 42.0%) |                     |                                               |
| <b>Overdiagnosis information</b>                                          |                    |                                                        |                                     |                     |                                               |
| Breast screening text vs. Prostate screening text                         | 987<br>901         | 583 (59.1)<br>512 (56.8)                               | 404 (40.9)<br>389 (43.2)            | 0.87, 0.70 to 1.09  | .224                                          |
| <b>Gender</b>                                                             |                    |                                                        |                                     |                     |                                               |
| Male vs. Female                                                           | 879<br>1,009       | 534 (60.8)<br>561 (55.6)                               | 345 (39.2)<br>448 (44.4)            | 1.00, 0.79 to 1.26  | .998                                          |
| <b>Ethnicity</b>                                                          |                    |                                                        |                                     |                     |                                               |
| White British vs. Other ethnic groups                                     | 1,432<br>456       | 775 (54.1)<br>320 (70.2)                               | 657 (45.9)<br>136 (29.8)            | 2.14, 1.61 to 2.84  | <b>&lt;.0005</b>                              |
| <b>Marital status</b>                                                     |                    |                                                        |                                     |                     |                                               |
| Married or living as a couple vs. Single, widowed, divorced, or separated | 1,133<br>755       | 661 (58.3)<br>434 (57.5)                               | 472 (41.7)<br>321 (42.5)            | 0.87, 0.69 to 1.09  | .216                                          |
| <b>Highest level of education</b>                                         |                    |                                                        |                                     |                     |                                               |
| Other levels vs. No formal qualifications or don't know                   | 199<br>292         | 116 (58.3)<br>228 (78.1)                               | 83 (41.7)<br>64 (21.9)              | 2.32, 1.46 to 3.68  | Overall: <b>&lt;.0005</b><br><b>&lt;.0005</b> |
| Approximately Level 4                                                     | 507                | 219 (43.2)                                             | 288 (56.8)                          | 4.17, 2.75 to 6.33  | <b>&lt;.0005</b>                              |
| Approximately Level 1, 2, or 3                                            | 890                | 532 (59.8)                                             | 358 (40.2)                          | 2.19, 1.52 to 3.15  | <b>&lt;.0005</b>                              |
| <b>Social class grade</b>                                                 |                    |                                                        |                                     |                     |                                               |
| Grade A or B vs. Grade D or E                                             | 386<br>571         | 170 (44.0)<br>383 (67.1)                               | 216 (56.0)<br>188 (32.9)            | 1.54, 1.09 to 2.17  | Overall: <b>.050</b><br><b>.014</b>           |
| Grade C1 or C2                                                            | 931                | 542 (58.2)                                             | 389 (41.8)                          | 1.19, 0.91 to 1.55  | .201                                          |
| <b>Personal diagnosis of cancer</b>                                       |                    |                                                        |                                     |                     |                                               |
| Yes vs. No                                                                | 98<br>1,790        | 49 (50.0)<br>1,046 (58.4)                              | 49 (50.0)<br>744 (41.6)             | 1.10, 0.68 to 1.80  | .690                                          |
| <b>Knows someone with cancer</b>                                          |                    |                                                        |                                     |                     |                                               |
| Yes vs. No or don't know                                                  | 1,113<br>775       | 562 (50.5)<br>533 (68.8)                               | 551 (49.5)<br>242 (31.2)            | 1.50, 1.19 to 1.89  | <b>.001</b>                                   |
| <b>Previously read a screening leaflet</b>                                |                    |                                                        |                                     |                     |                                               |
| Yes vs. No or not sure                                                    | 1,058<br>830       | 535 (50.6)<br>560 (67.5)                               | 523 (49.4)<br>270 (32.5)            | 1.27, 0.97 to 1.66  | .089                                          |
| <b>Previously read an NHS screening website</b>                           |                    |                                                        |                                     |                     |                                               |
| Yes vs. No or not sure                                                    | 324<br>1,564       | 125 (38.6)<br>970 (62.0)                               | 199 (61.4)<br>594 (38.0)            | 1.45, 1.07 to 1.97  | <b>.016</b>                                   |
| <b>Discussed screening with doctor/nurse</b>                              |                    |                                                        |                                     |                     |                                               |
| Yes vs. No                                                                | 624<br>1,264       | 276 (44.2)<br>819 (64.8)                               | 348 (55.8)<br>445 (35.2)            | 1.34, 1.03 to 1.74  | <b>.030</b>                                   |
| <b>Previously read or heard similar information</b>                       |                    |                                                        |                                     |                     |                                               |
| Yes vs. No or not sure                                                    | 662<br>1,226       | 266 (40.2)<br>829 (67.6)                               | 396 (59.8)<br>397 (32.4)            | 2.30, 1.81 to 2.94  | <b>&lt;.0005</b>                              |
| <b>Endorsed any term(s) as making sense</b>                               |                    |                                                        |                                     |                     |                                               |
| Yes vs. No                                                                | 1,051<br>837       | 426 (40.5)<br>669 (79.9)                               | 625 (59.5)<br>168 (20.1)            | 4.92, 3.94 to 6.17  | <b>&lt;.0005</b>                              |
| <b>Perceived clarity of information</b>                                   |                    |                                                        |                                     |                     |                                               |
| Extremely clear vs. Not at all clear                                      | 170<br>191         | 87 (51.2)<br>115 (60.2)                                | 83 (48.8)<br>76 (39.8)              | 0.85, 0.52 to 1.40  | Overall: <b>.534</b><br><b>.525</b>           |
| Very clear                                                                | 636                | 339 (53.3)                                             | 297 (46.7)                          | 0.97, 0.65 to 1.43  | .860                                          |
| Moderately clear                                                          | 685                | 424 (61.9)                                             | 261 (38.1)                          | 0.78, 0.53 to 1.16  | .225                                          |
| Slightly clear                                                            | 206                | 130 (63.1)                                             | 76 (36.9)                           | 0.92, 0.57 to 1.49  | .745                                          |
| <b>Mean (SD)</b>                                                          |                    |                                                        |                                     |                     |                                               |
| <b>Age (in years)</b>                                                     | 1,888              | 43.8 (15.7)                                            | 43.3 (15.8)                         | 0.99, 0.98 to 1.00  | <b>.003</b>                                   |

N.B. Adjusted ORs and 95% CIs are relative to a stated reference category except age, which is per unit increase; p-values <.05 are in bold; all predictor variables are included in the model

Table 4 – Number of participants (and percentages and 95% CIs) endorsing i) each number of possible terms and ii) each specific term as making sense to them as a label

|                       |        | Number of terms endorsed as making sense as a way of describing the text: n, %, 95% CIs              |               |                       |               |                       |                          |                             |              |  |
|-----------------------|--------|------------------------------------------------------------------------------------------------------|---------------|-----------------------|---------------|-----------------------|--------------------------|-----------------------------|--------------|--|
| Screening information | Total  | 0                                                                                                    | 1             | 2                     | 3             | 4                     | 5                        | 6                           | 7            |  |
| Breast                | n (%)  | 429 (43.5)                                                                                           | 76 (7.7)      | 86 (8.7)              | 74 (7.5)      | 67 (6.8)              | 58 (5.9)                 | 42 (4.3)                    | 155 (15.7)   |  |
| n=987                 | 95% CI | 40.4 to 46.6                                                                                         | 6.2 to 9.5    | 7.1 to 10.6           | 6.0 to 9.3    | 5.3 to 8.5            | 4.5 to 7.5               | 3.1 to 5.7                  | 13.5 to 18.1 |  |
| Prostate              | n (%)  | 408 (45.3)                                                                                           | 59 (6.5)      | 73 (8.1)              | 68 (7.5)      | 66 (7.3)              | 48 (5.3)                 | 37 (4.1)                    | 142 (15.8)   |  |
| n=901                 | 95% CI | 42.1 to 48.5                                                                                         | 5.1 to 8.3    | 6.5 to 10.0           | 6.0 to 9.4    | 5.8 to 9.2            | 4.0 to 6.9               | 3.0 to 5.6                  | 13.5 to 18.2 |  |
| Total                 | n (%)  | 837 (44.3)                                                                                           | 135 (7.2)     | 159 (8.4)             | 142 (7.5)     | 133 (7.0)             | 106 (5.6)                | 79 (4.2)                    | 297 (15.7)   |  |
| N=1,888               | 95% CI | 42.1 to 46.6                                                                                         | 6.1 to 8.4    | 7.2 to 9.7            | 6.4 to 8.8    | 6.0 to 8.3            | 4.6 to 6.7               | 3.4 to 5.2                  | 14.1 to 17.4 |  |
|                       |        | <i>"Which terms make sense as a way of describing this risk of a screening test?": n, %, 95% CIs</i> |               |                       |               |                       |                          |                             |              |  |
| Screening information | Total  | Overdiagnosis                                                                                        | Overdetection | Unnecessary diagnosis | Overtreatment | Unnecessary treatment | False positive diagnosis | False positive test results |              |  |
| Breast                | n (%)  | 334 (33.8)                                                                                           | 275 (27.9)    | 349 (35.4)            | 336 (34.0)    | 409 (41.4)            | 324 (32.8)               | 338 (34.2)                  |              |  |
| n=987                 | 95% CI | 30.9 to 36.8                                                                                         | 25.1 to 30.7  | 32.4 to 38.4          | 31.1 to 37.0  | 38.4 to 44.5          | 30.0 to 35.8             | 31.3 to 37.2                |              |  |
| Prostate              | n (%)  | 291 (32.3)                                                                                           | 247 (27.4)    | 307 (34.1)            | 280 (31.1)    | 354 (39.3)            | 320 (35.5)               | 330 (36.6)                  |              |  |
| n=901                 | 95% CI | 29.3 to 35.4                                                                                         | 24.6 to 30.4  | 31.0 to 37.2          | 28.1 to 34.2  | 36.1 to 42.5          | 32.4 to 38.7             | 33.5 to 39.8                |              |  |
| Total                 | n (%)  | 625 (33.1)                                                                                           | 522 (27.6)    | 656 (34.7)            | 616 (32.6)    | 763 (40.4)            | 644 (34.1)               | 668 (35.4)                  |              |  |
| N=1,888               | 95% CI | 31.0 to 35.3                                                                                         | 25.7 to 29.7  | 32.6 to 36.9          | 30.5 to 34.8  | 38.2 to 42.6          | 32.0 to 36.3             | 33.2 to 37.6                |              |  |

Table 5 – Endorsed one or more vs. no terms as making sense: descriptive statistics, adjusted ORs, 95% CIs, and p-values for variables in the multivariable binary logistic regression model

| Characteristic                                                                  | Total<br>(N=1,888) | Endorsed no vs. at least one term as<br>making sense: n (%) |                                       | Adjusted OR, 95% CI                                           | p-value          |
|---------------------------------------------------------------------------------|--------------------|-------------------------------------------------------------|---------------------------------------|---------------------------------------------------------------|------------------|
|                                                                                 |                    | No term<br>(n=837; 44.3%)                                   | At least one term<br>(n=1,051; 55.7%) |                                                               |                  |
| <b>Overdiagnosis information</b>                                                |                    |                                                             |                                       | <b>At least one term endorsed<br/>(vs. No terms endorsed)</b> |                  |
| Breast screening text<br>vs. Prostate screening text                            | 987<br>901         | 429 (43.5)<br>408 (45.3)                                    | 558 (56.5)<br>493 (54.7)              | 1.16, 0.95 to 1.42                                            | .148             |
| <b>Gender</b>                                                                   |                    |                                                             |                                       |                                                               |                  |
| Male<br>vs. Female                                                              | 879<br>1,009       | 380 (43.2)<br>457 (45.3)                                    | 499 (56.8)<br>552 (54.7)              | 1.40, 1.13 to 1.74                                            | <b>.002</b>      |
| <b>Ethnicity</b>                                                                |                    |                                                             |                                       |                                                               |                  |
| White British<br>vs. Other ethnic groups                                        | 1,432<br>456       | 592 (41.3)<br>245 (53.7)                                    | 840 (58.7)<br>211 (46.3)              | 1.25, 0.97 to 1.61                                            | .080             |
| <b>Marital status</b>                                                           |                    |                                                             |                                       |                                                               |                  |
| Married or living as a couple<br>vs. Single, widowed, divorced,<br>or separated | 1,133<br>755       | 500 (44.1)<br>337 (44.6)                                    | 633 (55.9)<br>418 (55.4)              | 1.05, 0.85 to 1.30                                            | .671             |
| <b>Highest level of education</b>                                               |                    |                                                             |                                       |                                                               | Overall: .556    |
| Other levels                                                                    | 199                | 88 (44.2)                                                   | 111 (55.8)                            | 1.21, 0.80 to 1.82                                            | .374             |
| Approximately Level 4                                                           | 507                | 190 (37.5)                                                  | 317 (62.5)                            | 1.27, 0.88 to 1.84                                            | .204             |
| Approximately Level 1, 2, or 3                                                  | 890                | 396 (44.5)                                                  | 494 (55.5)                            | 1.24, 0.91 to 1.70                                            | .169             |
| vs. No formal qualifications or<br>don't know                                   | 292                | 163 (55.8)                                                  | 129 (44.2)                            |                                                               |                  |
| <b>Social class grade</b>                                                       |                    |                                                             |                                       |                                                               | Overall: .574    |
| Grade A or B                                                                    | 386                | 137 (35.5)                                                  | 249 (64.5)                            | 1.09, 0.78 to 1.51                                            | .617             |
| Grade C1 or C2                                                                  | 931                | 420 (45.1)                                                  | 511 (54.9)                            | 0.94, 0.74 to 1.19                                            | .604             |
| vs. Grade D or E                                                                | 571                | 280 (49.0)                                                  | 291 (51.0)                            |                                                               |                  |
| <b>Personal diagnosis of cancer</b>                                             |                    |                                                             |                                       |                                                               |                  |
| Yes<br>vs. No                                                                   | 98<br>1,790        | 37 (37.8)<br>800 (44.7)                                     | 61 (62.2)<br>990 (55.3)               | 1.08, 0.68 to 1.74                                            | .741             |
| <b>Knows someone with cancer</b>                                                |                    |                                                             |                                       |                                                               |                  |
| Yes<br>vs. No or don't know                                                     | 1,113<br>775       | 427 (38.4)<br>410 (52.9)                                    | 686 (61.6)<br>365 (47.1)              | 1.35, 1.09 to 1.68                                            | <b>.005</b>      |
| <b>Previously read a screening leaflet</b>                                      |                    |                                                             |                                       |                                                               |                  |
| Yes<br>vs. No or not sure                                                       | 1,058<br>830       | 416 (39.3)<br>421 (50.7)                                    | 642 (60.7)<br>409 (49.3)              | 1.18, 0.91 to 1.52                                            | .206             |
| <b>Previously read an NHS screening website</b>                                 |                    |                                                             |                                       |                                                               |                  |
| Yes<br>vs. No or not sure                                                       | 324<br>1,564       | 109 (33.6)<br>728 (46.5)                                    | 215 (66.4)<br>836 (53.5)              | 1.01, 0.75 to 1.37                                            | .955             |
| <b>Discussed screening with doctor/nurse</b>                                    |                    |                                                             |                                       |                                                               |                  |
| Yes<br>vs. No                                                                   | 624<br>1,264       | 217 (34.8)<br>620 (49.1)                                    | 407 (65.2)<br>644 (50.9)              | 1.25, 0.97 to 1.61                                            | .091             |
| <b>Previously read or heard similar<br/>information</b>                         |                    |                                                             |                                       |                                                               |                  |
| Yes<br>vs. No or not sure                                                       | 662<br>1,226       | 224 (33.8)<br>613 (50.0)                                    | 438 (66.2)<br>613 (50.0)              | 1.18, 0.93 to 1.50                                            | .185             |
| <b>Previously encountered any term(s)</b>                                       |                    |                                                             |                                       |                                                               |                  |
| Yes<br>No                                                                       | 1,051<br>837       | 168 (21.2)<br>669 (61.1)                                    | 625 (78.8)<br>426 (38.9)              | 4.88, 3.89 to 6.11                                            | <b>&lt;.0005</b> |
| <b>Perceived clarity of information</b>                                         |                    |                                                             |                                       |                                                               | Overall: .148    |
| Extremely clear                                                                 | 170                | 67 (39.4)                                                   | 103 (60.6)                            | 1.36, 0.85 to 2.17                                            | .204             |
| Very clear                                                                      | 636                | 255 (40.1)                                                  | 381 (59.9)                            | 1.38, 0.96 to 1.98                                            | .083             |
| Moderately clear                                                                | 685                | 308 (45.0)                                                  | 377 (55.0)                            | 1.39, 0.97 to 1.98                                            | .073             |
| Slightly clear                                                                  | 206                | 109 (52.9)                                                  | 97 (47.1)                             | 0.99, 0.64 to 1.53                                            | .953             |
| vs. Not at all clear                                                            | 191                | 98 (51.3)                                                   | 93 (48.7)                             |                                                               |                  |
|                                                                                 |                    | <b>Mean (SD)</b>                                            |                                       |                                                               |                  |
| <b>Age (in years)</b>                                                           | 1,888              | 43.4 (15.6)                                                 | 43.7 (15.8)                           | 1.00, 0.99 to 1.00                                            | .262             |

N.B. Adjusted ORs and 95% CIs are relative to a stated reference category except age, which is per unit increase; p-values <.05 are in bold; all predictor variables are included in the model

## DISCUSSION

This study aimed to address a gap in the literature regarding how best to communicate the issue of overdiagnosis (8). We investigated whether people are familiar with terms used to define overdiagnosis or related concepts, and whether these made sense as labels for either of two widely used descriptions. We found that a majority of participants (58.0%) had never encountered any of the assessed terms before and a large proportion (44.3%) did not rate any as making sense as a suitable label. In addition, no specific term(s) emerged as being notably more familiar or applicable.

An earlier similar study found that only 30.0% of the UK general public (aged 50-70) had previously encountered the specific term, 'overdiagnosis' (9), which is broadly comparable to the 21.8% who reported having encountered it in this study. Our findings are also consistent with those of a previous study carried out as part of the redesign of the information materials for the NHS Breast Screening Programme (20). Women were interviewed with the aim of finding ways to communicate the concept of overdiagnosis: participants generally struggled to understand it, regardless of whether it was labelled as 'overdiagnosis' or 'overtreatment'.

Terminology can have a role in transferring information to lay individuals as part of a description of technical concepts (11,21). However, the main implication of our results is that there may currently only be limited value in using any of the labels that we tested. Terms used were neither familiar nor rated as particularly relevant in this large, diverse sample, meaning that they may be confusing, unintuitive, and hard for people to memorise and recall. Even the most technically appropriate terms (e.g. 'overdiagnosis' and 'overdetection') were not endorsed as making sense more frequently than suggested alternative terminology (e.g. 'unnecessary diagnosis) or more inaccurate and potentially problematic terminology (e.g. 'false positive

1  
2  
3  
4  
5  
6  
7  
8 diagnosis'). To some extent, the currently limited familiarity and low levels of endorsement  
9 supports UK policy decisions not to use a specific term in the revised breast screening  
10 information leaflet (20). Furthermore, shortly before the start of recruitment, an updated NHS  
11 information leaflet regarding PSA screening was published, with additional detail on  
12 information leaflet regarding PSA screening was published, with additional detail on  
13 overdiagnosis and overtreatment (22); this also omitted any specific descriptive label.  
14  
15

16  
17  
18 A potential explanation for the low proportions of participants endorsing each term comes from  
19 a recent survey in the United States. This used a similar design to the present study in which  
20 women aged 35-55 years were recruited to respond to brief descriptions of overdiagnosis and  
21 overtreatment. Only a small minority of participants (approximately 15-20%) endorsed  
22 messages as either believable and something with which they agreed (23). To some extent, this  
23 is consistent with qualitative research showing that the concept is often surprising and confusing  
24 to lay people (6, 7). Limited acceptance of the description of overdiagnosis itself may have  
25 resulted in participants disengaging with the concept and hence not rating any of the available  
26 terms as appropriate. It may be relevant that both sets of descriptions were presented outside of  
27 contexts in which they would normally be encountered (e.g. the original screening information  
28 leaflets from which they were adapted). Both comprehension and acceptance may be different  
29 (either better or worse) in the presence of additional detail (15), either from a full leaflet or as  
30 part of a discussion with a clinician. This warrants further research.  
31  
32  
33  
34  
35  
36  
37  
38  
39  
40

41  
42 One unexpected finding was that the second most common number of terms that were familiar  
43 or endorsed was all seven (12.3% and 15.7%, respectively). This may be due to the differences  
44 between terms being subtle: members of the public may not recall exactly which terms they had  
45 encountered but felt that broader concepts like diagnosis and treatment were familiar.  
46  
47  
48  
49  
50  
51  
52  
53  
54  
55  
56  
57  
58  
59  
60

1  
2  
3  
4  
5  
6  
7  
8 We found that participants with a lower level of education, who were not White British, were  
9 older, or (possibly) were from a lower social class grade were less likely to have previously  
10 encountered any term(s), suggesting that these groups may be particularly poorly served by the  
11 use of any specific terminology. Unsurprisingly, those who had previous exposure to cancer (i.e.  
12 by knowing someone with a diagnosis) and those who had encountered potentially relevant  
13 information (e.g. those who had previously discussed screening with a doctor or nurse) were  
14 more likely to have encountered any term(s). In some respects, this latter finding was surprising  
15 because although medical staff might be expected to discuss overdiagnosis with patients, there  
16 is evidence that the topic is explained only rarely (24). Those who knew someone with cancer  
17 were also more likely to endorse at least one term as making sense. It is unclear why males  
18 were more likely to endorse term(s) as making sense. This may warrant further research  
19 (possible explanations may include a degree of over-confidence in men or under-confidence in  
20 women), although this should be considered in the context of small absolute differences  
21 observed here (56.8% vs. 54.7% endorsing at least one term).  
22  
23  
24  
25  
26  
27  
28  
29  
30  
31  
32  
33

34 Continuing communication efforts mean that these results may change over time: it is plausible  
35 that ongoing campaigns (e.g. 3-5) will result in the public becoming increasingly familiar with the  
36 concept and terminology, having a better understanding of the differences between similar  
37 terms (e.g. seeing 'false positives' as distinct from 'overdiagnosis'), and being more likely to  
38 endorse particular terms as applicable. However, present attempts to communicate  
39 overdiagnosis (e.g. as part of screening invitations or mainstream media stories) may be more  
40 effective if explicit descriptions are used, such as adapted forms of information from the Breast  
41 Screening Programme. This has undergone an extensive design process (20) and is more likely  
42 to be rated as clearer than the equivalent from the Prostate Cancer Risk Management  
43 Programme. However, fewer than half of participants (46.6%) rated it as very or extremely clear,  
44  
45  
46  
47  
48  
49  
50  
51  
52  
53  
54  
55  
56  
57  
58  
59  
60

1  
2  
3  
4  
5  
6  
7  
8 suggesting that future research could be used to improve it further (e.g. by providing additional  
9 detail; 15).

10  
11  
12 This study has limitations. The data collection method used by the survey company meant that  
13 demographic characteristics used to ensure population-representativeness were not exhaustive  
14 (e.g. they omitted ethnicity and education) and response rates were not available. The list of  
15 terms tested was also not exhaustive; there may be suitable terminology that we did not assess.  
16 However, we found very similar levels of endorsement for terms that used several variations on  
17 the themes of diagnosis, treatment, and false positives, providing some evidence that any  
18 superior terms would have to be quite different.  
19  
20  
21  
22  
23  
24

## 25 26 **Conclusions**

27  
28 Alternative terminology to 'overdiagnosis' may help increase awareness and understanding of  
29 the concept among individuals who may face healthcare decisions that would put them at risk.  
30 These results suggest that, at present, using specific terms would have limited benefits and may  
31 be less well suited to particular groups (e.g. less educated or non-White British individuals). It  
32 may currently be more effective to refer to the concept via more explicit descriptions. Previous  
33 research indicates that information from the NHS Breast Screening Programme may be a  
34 relatively effective template for this purpose. However, future research could explore scope for  
35 improvement.  
36  
37  
38  
39  
40  
41  
42

43  
44 **Contributors:** AG, CR, and JW conceived and designed the study. AG analysed the data. AG,  
45 CR, and JW participated in the interpretation of results. AG, CR, and JW drafted the manuscript,  
46 participated in critical revision, and approved the final version.  
47  
48  
49  
50  
51  
52  
53  
54  
55  
56  
57  
58  
59  
60

1  
2  
3  
4  
5  
6  
7  
8 **Funding:** This work was supported by a programme grant from Cancer Research UK awarded  
9 to Prof Jane Wardle [C1418/A14134]. Dr Jo Waller is supported by a Career Development  
10 Fellowship from Cancer Research UK [C7492/A17219]. Cancer Research UK was not involved  
11 in the design of this study; the collection, analysis, or interpretation of the results; in the writing  
12 of the manuscript; or in the decision to submit for publication.  
13  
14  
15  
16

17  
18 **Competing interests:** None declared.  
19

20 **Patient consent:** Obtained.  
21  
22

23 **Data sharing:** No additional data are available.  
24  
25

## 26 REFERENCES

- 27  
28 1. Heath I. Overdiagnosis: when good intentions meet vested interests — an essay by Iona  
29 Heath. *Br Med J.* 2013;347:f6361.  
30
- 31  
32 2. Moynihan R, Doust J, Henry D. Preventing overdiagnosis: how to stop harming he  
33 healthy. *Br Med J.* 2012;344:e3502.  
34  
35
- 36  
37 3. Glasziou P, Moynihan R, Richards T, Godlee F. Too much medicine; too little care. *Br*  
38 *Med J.* 2013;347:f4247.  
39  
40
- 41  
42 4. Malhotra A, Maughan D, Ansell J, et al. Choosing Wisely in the UK: the Academy of  
43 Medical Royal Colleges' initiative to reduce the harms of too much medicine. *Br Med J.*  
44 2015;350:h2308.  
45  
46
- 47  
48 5. Calderwood C. Chief Medical Officer's annual report 2014-15. 2016.  
49 <http://www.gov.scot/Publications/2016/01/3745/0>  
50  
51  
52  
53  
54  
55  
56  
57  
58  
59  
60

- 1  
2  
3  
4  
5  
6  
7  
8 6. Hersch J, Jansen J, Barratt A, et al. Women's views on overdiagnosis in breast cancer  
9 screening: a qualitative study. *Br Med J*. 2013;346:f158.  
10
- 11  
12 7. Waller J, Douglas E, Whitaker KL, Wardle J. Women's responses to information about  
13 overdiagnosis in the UK breast cancer screening programme: a qualitative study. *BMJ*  
14 *Open*. 2013;3:e002703.  
15
- 16  
17 8. McCaffery KJ, Jansen J, Scherer LD, et al. Walking the tightrope: communicating  
18 overdiagnosis in modern healthcare. *Br Med J*. 2016;352:i348.  
19
- 20  
21 9. Ghanouni A, Meisel SF, Renzi C, Wardle J, Waller J. Public definitions of the term  
22 'overdiagnosis' in the UK. *BMJ Open*. 2016;e010723.  
23
- 24  
25 10. Moynihan R, Nickel B, Hersch J, et al. What do you think overdiagnosis means? A  
26 qualitative analysis of responses from a national community survey of Australians. *BMJ*  
27 *Open*. 2015;5:e007436.  
28
- 29  
30 11. Hersch J, Jansen J, Barratt A, et al. Overdetection in breast cancer screening:  
31 development and preliminary evaluation of a decision aid. *BMJ Open*. 2014;4:e006016.  
32
- 33  
34 12. Moynihan R, Nickel B, Hersch J, et al. Public opinions about overdiagnosis: a national  
35 community survey. *PLoS One*. 2015;10:e0125165.  
36
- 37  
38 13. NHS Breast Screening Programme. NHS Breast Screening: Helping you decide. 2013.  
39 Available from:  
40  
41 [https://www.gov.uk/government/uploads/system/uploads/attachment\\_data/file/440798/nh](https://www.gov.uk/government/uploads/system/uploads/attachment_data/file/440798/nh_sbsp.pdf)  
42 [sbsp.pdf](https://www.gov.uk/government/uploads/system/uploads/attachment_data/file/440798/nh_sbsp.pdf)  
43  
44
- 45  
46 14. Burford D, Austoker J, Kirby M. PSA (prostate specific antigen) testing for prostate  
47  
48  
49  
50  
51  
52  
53  
54  
55  
56  
57  
58  
59  
60

- 1  
2  
3  
4  
5  
6  
7  
8 cancer. An information sheet for men considering a PSA test. 2009.  
9  
10  
11 15. Ghanouni A, Renzi C, McBride E, Waller J. Comparing perceived clarity of information  
12 on overdiagnosis used for breast and prostate cancer screening in England: an  
13 experimental survey. *BMJ Open*. 2017;7:e015955.  
14  
15  
16  
17 16. National Readership Survey. Social grade. [http://www.nrs.co.uk/nrs-print/lifestyle-and-](http://www.nrs.co.uk/nrs-print/lifestyle-and-classification-data/social-grade/)  
18 [classification-data/social-grade/](http://www.nrs.co.uk/nrs-print/lifestyle-and-classification-data/social-grade/) Accessed: 1<sup>st</sup> December 2017.  
19  
20  
21  
22 17. Weinstein ND. The precaution adoption process. *Health Psychol*. 1988;7:355–86.  
23  
24  
25 18. Willis GB, Artino AR. What do our respondents think we're asking? using cognitive  
26 interviewing to improve medical education surveys. *J Grad Med Educ* 2013;5:353–6.  
27  
28  
29 19. Office of National Statistics. 2011 Census: Key Statistics for England and Wales, March  
30 2011. 2012 [http://www.ons.gov.uk/ons/rel/census/2011-census/key-statistics-for-local-](http://www.ons.gov.uk/ons/rel/census/2011-census/key-statistics-for-local-authorities-in-england-and-wales/stb-2011-census-key-statistics-for-england-and-wales.html)  
31 [authorities-in-england-and-wales/stb-2011-census-key-statistics-for-england-and-](http://www.ons.gov.uk/ons/rel/census/2011-census/key-statistics-for-local-authorities-in-england-and-wales/stb-2011-census-key-statistics-for-england-and-wales.html)  
32 [wales.html](http://www.ons.gov.uk/ons/rel/census/2011-census/key-statistics-for-local-authorities-in-england-and-wales/stb-2011-census-key-statistics-for-england-and-wales.html) (accessed 28 Nov 2016).  
33  
34  
35  
36  
37 20. Forbes LJ, Ramirez AJ. Expert group on Information about Breast Screening. Offering  
38 informed choice about breast screening. *J Med Screen*. 2014;21:194–200.  
39  
40  
41 21. Fage-Butler AM, Nisbeth Jensen M. Medical terminology in online patient-patient  
42 communication: evidence of high health literacy? *Health Expect*. 2016;19:643–53.  
43  
44  
45 22. Public Health England. PSA testing and prostate cancer: advice for well men aged 50  
46 and over. 2016. Available from:  
47 [https://www.gov.uk/government/uploads/system/uploads/attachment\\_data/file/509191/P-](https://www.gov.uk/government/uploads/system/uploads/attachment_data/file/509191/Patient_info_sheet.pdf)  
48 [atient\\_info\\_sheet.pdf](https://www.gov.uk/government/uploads/system/uploads/attachment_data/file/509191/Patient_info_sheet.pdf)  
49  
50  
51  
52  
53  
54  
55  
56  
57  
58  
59  
60

- 1  
2  
3  
4  
5  
6  
7  
8 23. Nagler RH, Fowler EF, Gollust SE. Women's awareness of and responses to messages  
9 about breast cancer overdiagnosis and overtreatment: Results from a 2016 national  
10 survey. *Med Care*. 2017;55:879-85.  
11  
12  
13  
14 24. Wegwarth O, Gigerenzer G. Less is more: overdiagnosis and overtreatment: evaluation  
15 of what physicians tell their patients about screening harms. *JAMA Intern Med*.  
16 2013;173:2086-7.  
17  
18  
19  
20  
21  
22  
23  
24  
25  
26  
27  
28  
29  
30  
31  
32  
33  
34  
35  
36  
37  
38  
39  
40  
41  
42  
43  
44  
45  
46  
47  
48  
49  
50  
51  
52  
53  
54  
55  
56  
57  
58  
59  
60
